# Supplementary material for: Frequent horizontal chromosome transfer between asexual fungal insect pathogens
Source: PubMed Central journal article supplement — Proc Natl Acad Sci U S A. 2024 Mar 5;121(11):e2316284121. doi: 10.1073/pnas.2316284121 (PMC10945790; doi:10.1073/pnas.2316284121), 2024-03-05
Supplement: pnas.2316284121.sapp.pdf [file pnas.2316284121.sapp.pdf]

## **Supporting Information for**

### Frequent horizontal chromosome transfer between asexual fungal insect pathogens

*Authors:*

Michael Habig<sup>1,2\*</sup>, Anna V. Grasse<sup>3</sup>, Judith Müller<sup>1,2</sup>, Eva H. Stukenbrock<sup>1,2</sup>, Hanna Leitner<sup>3</sup>, Sylvia Cremer<sup>3\*</sup>

*Author affiliation:*

1) Environmental Genomics, Christian-Albrechts University of Kiel, Germany, 2) Max Planck Institute for Evolutionary Biology, Plön, Germany, 3) ISTA (Institute of Science and Technology Austria), Klosterneuburg, Austria

*Corresponding authors:*

Michael Habig, email: mhabig@bot.uni-kiel.de

Sylvia Cremer, email: sylvia.cremer@ist.ac.at

**This PDF file includes:**

Figures S1 to S9  
Tables S1 to S7  
Supporting text S1  
Legends for Datasets S1 to S14  
SI References

**Other supporting materials for this manuscript include the following:**

Datasets S1 to S14

## Content

|                                                                                       |    |
|---------------------------------------------------------------------------------------|----|
| 1. Figures S1 to S9 .....                                                             | 3  |
| Fig. S1 .....                                                                         | 3  |
| Fig. S2 .....                                                                         | 6  |
| Fig. S3 .....                                                                         | 8  |
| Fig. S4 .....                                                                         | 10 |
| Fig. S5 .....                                                                         | 11 |
| Fig. S6 .....                                                                         | 12 |
| Fig. S7 .....                                                                         | 13 |
| Fig. S8 .....                                                                         | 14 |
| Fig. S9 .....                                                                         | 16 |
| 2. Tables S1 to S7 .....                                                              | 17 |
| Table S1 .....                                                                        | 17 |
| Table S2 .....                                                                        | 20 |
| Table S3 .....                                                                        | 22 |
| Table S4 .....                                                                        | 23 |
| Table S5 .....                                                                        | 25 |
| Table S6 .....                                                                        | 26 |
| Table S7 .....                                                                        | 27 |
| 3. Supporting text S1. Detailed methods and materials.....                            | 29 |
| 3.1. Fungal strains and selection experiment outline .....                            | 29 |
| 3.2. Pulsed-field gel electrophoresis (PFGE).....                                     | 30 |
| 3.3. Proportion of chrA-containing spores over the course of the experiment.....      | 31 |
| Table S8.....                                                                         | 31 |
| 3.4. Generating Genome Assemblies.....                                                | 32 |
| Table S9.....                                                                         | 33 |
| 3.5. Generation of Annotations .....                                                  | 34 |
| 3.6. Comparison with existing reads and assemblies .....                              | 34 |
| 3.7. SNP calling using the Illumina reads of ancestral and evolved strains.....       | 35 |
| 3.8. Calling of structural variants using nanopore reads.....                         | 35 |
| 3.9. Phasing of SNPs and small InDels for <i>Metarhizium guizhouense</i> ARSEF977.... | 35 |
| 3.10. Phylogenetic analysis of putative histone encoding genes .....                  | 36 |
| 3.11. GO enrichment analysis and determination of gene-wise dn/ds ratios.....         | 37 |
| 3.12. Sequencing coverage analysis and distribution of SNPs in 50 kb windows .....    | 37 |
| 3.13. Genewise relative synonymous codon usage.....                                   | 37 |
| 3.14. Determining the Cytosine methylation within CpG context. ....                   | 37 |
| 3.15. Statistical tests .....                                                         | 38 |
| Table S10.....                                                                        | 38 |
| Table S11.....                                                                        | 39 |
| Table S12.....                                                                        | 40 |
| 4. Legends for Datasets S1 to S14.....                                                | 41 |
| 5. Supplemental References .....                                                      | 42 |

# 1. Figures S1 to S9

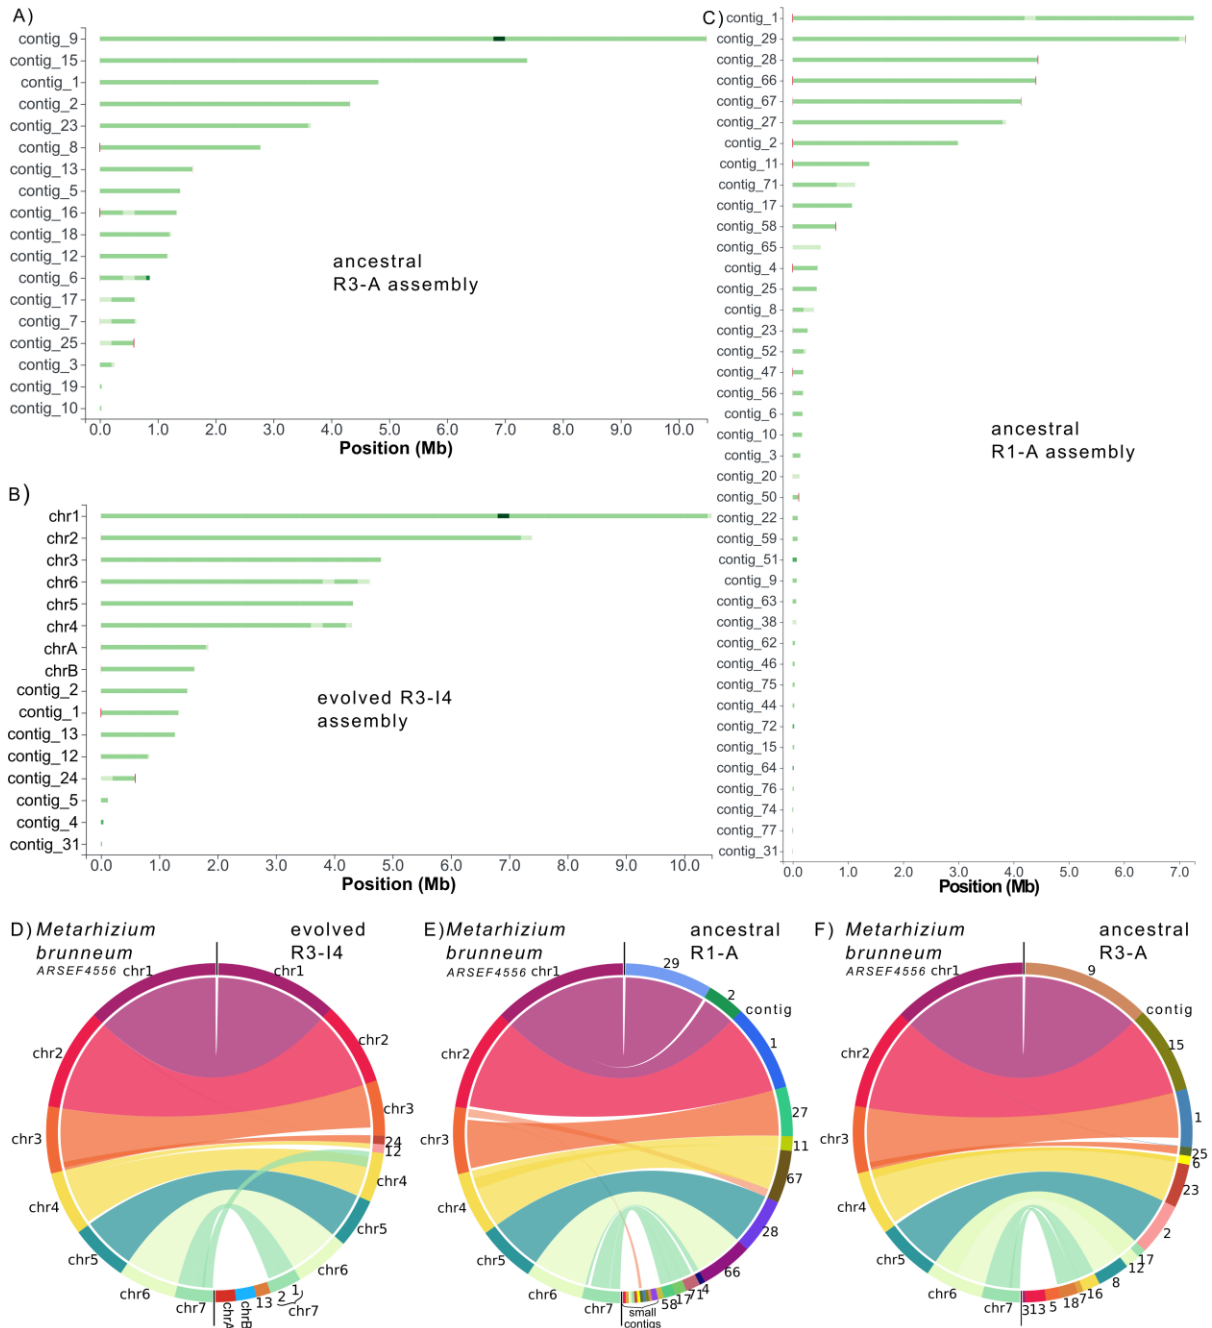

**Fig. S1.** Nanopore-based assemblies of *Metarhizium robertsii* ancestral R1-A, ancestral R3-A and the evolved R3-I4 strains at near chromosome level. Tapestry reports of the nanopore-based assemblies of A) ancestral R3-A, B) evolved R3-I4 and C) ancestral R1-A strain. Red marks represent the presence of telomere repeats, where the intensity of the red color is proportional to the number of repeats detected. Green intensity is

proportional to coverage. For a detailed description, see also Table S1. D) Synteny between the nanopore-based assemblies of *M. robertsii* strains R3-I4, R1-A and R3-A generated in this study and the *M. brunneum* ARSEF4556 reference assembly (GCA\_013426205.1) (36). Note that for R3-I4 chromosomes were labelled based on their synteny to the *M. brunneum* reference assembly.

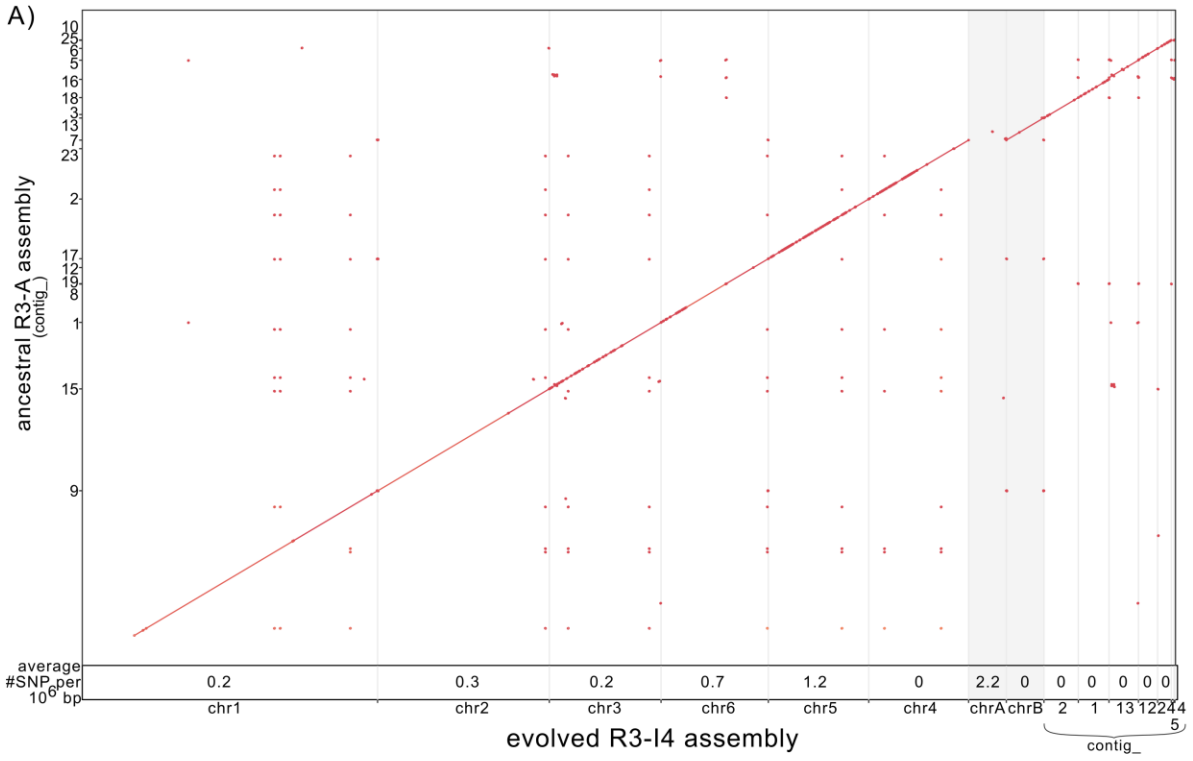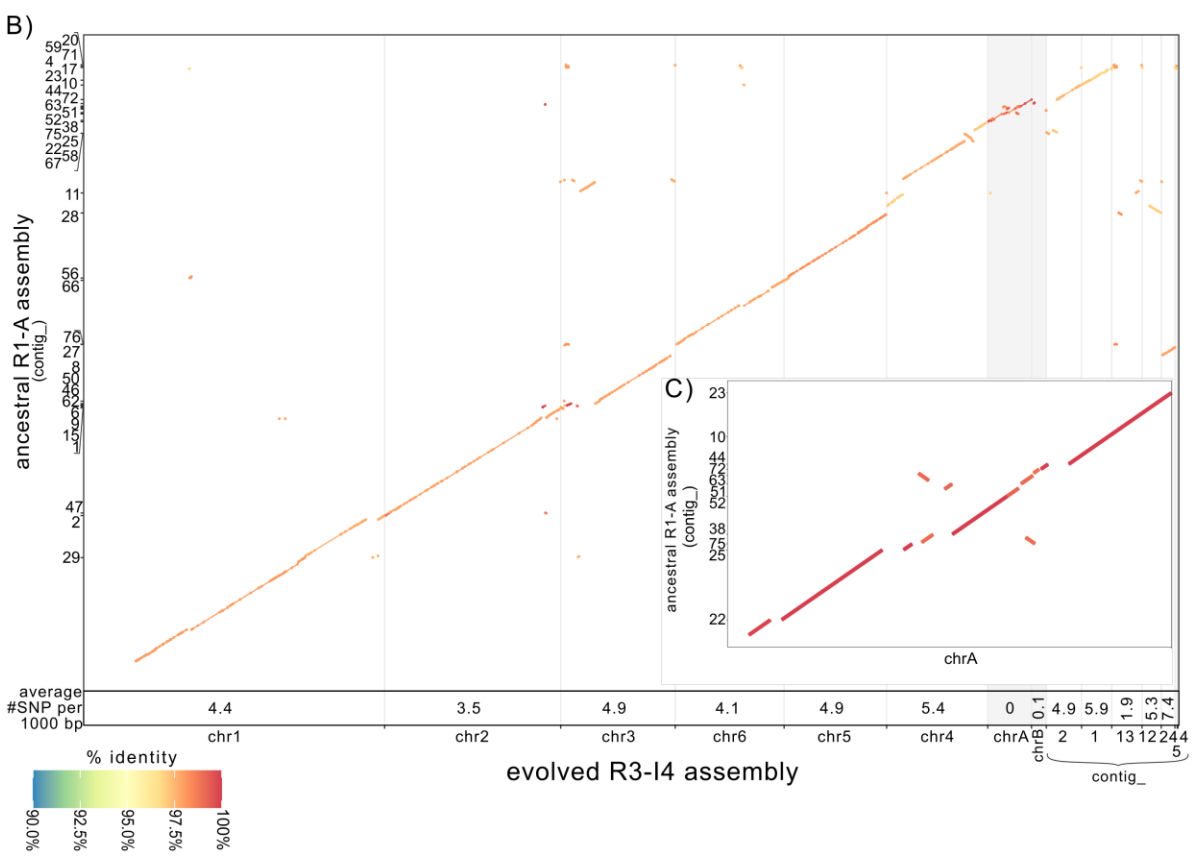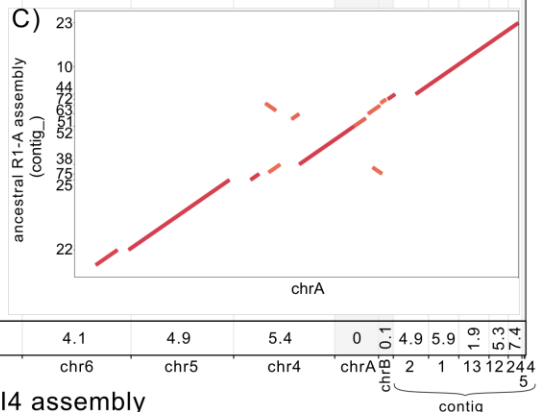

**Fig. S2.** Synteny plot between the nanopore-based assemblies of the A) ancestral R1-A or B) ancestral R3-A with the evolved R3-I4 strain, with synteny for chrA and chrB of the R3-I4 assembly highlighted in grey shade. In C) the alignment of R1-A contigs syntenic with chrA of the evolved R3-I4 is shown. Please note that the apparent structural variation between chrA of the evolved R3-I4 strain and the syntenic contigs of the ancestral R1-A most likely results from the high fragmentation of the R1-A assembly, since cross-mapping of Illumina reads, SNP calling, PFGE, analysis of larger structural variation and sequencing of excised PFGE bands (detailed in Fig. S3) did not find evidence of mutational processes or large-scale reorganization of chrA associated with its transfer from R1 to R3. All contigs of R1-A that are syntenic with chrA of R3-I4 are small (ranging from 30 to 437 kb, as shown in Table S1). The SNP density based on these alignments for each of the contigs is given at the bottom of each graph.

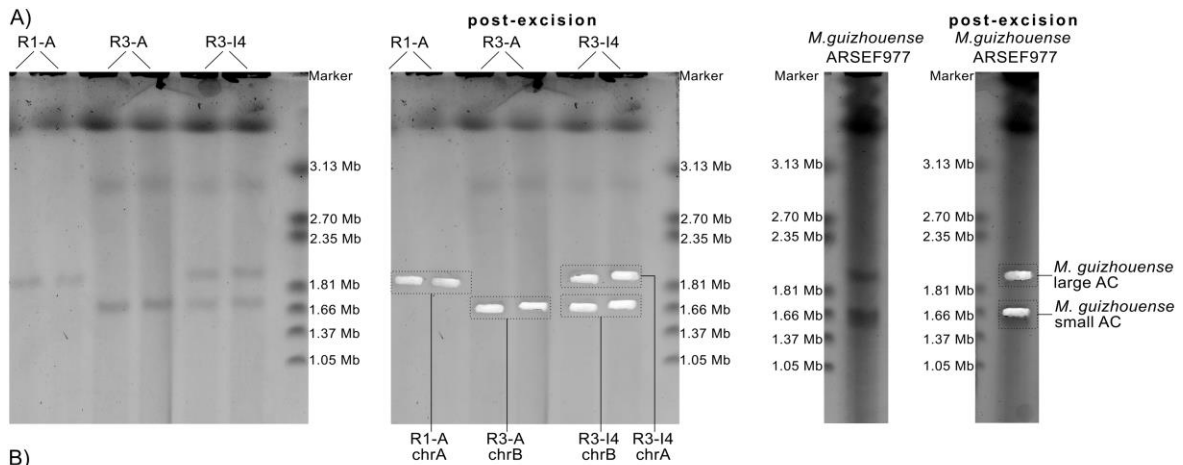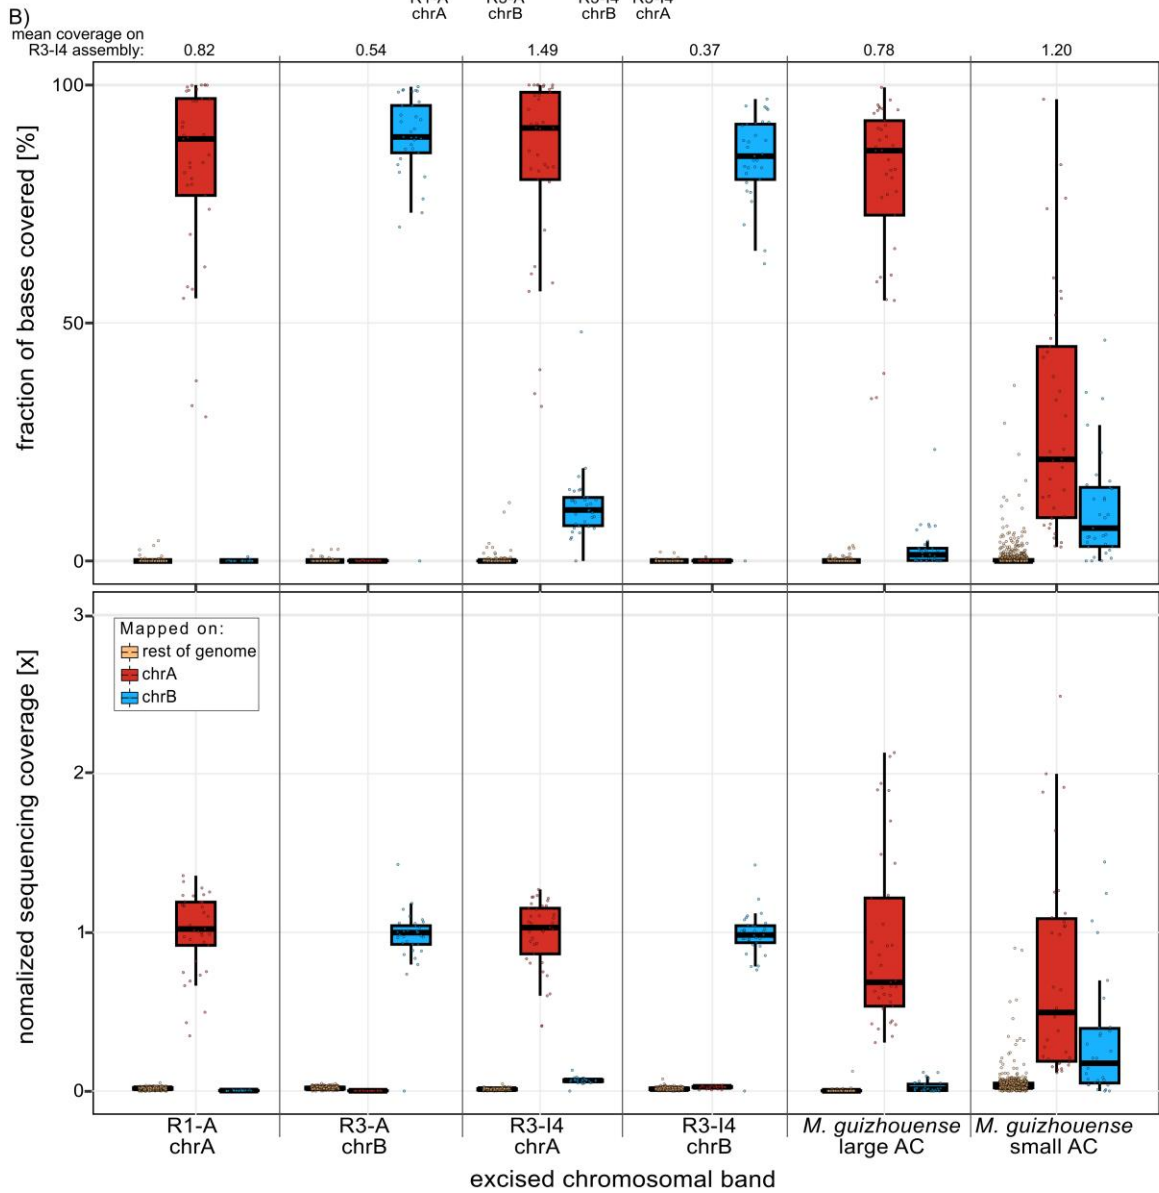

**Fig. S3.** Verification of inferred chromosomal band identity in PFGE through sequencing of excised bands. A) PFGE-gel of strains *M. robertsii* R1-A, R3-A and R3-I4, as well as *M. guizhouense* ARSEF977 before and after chromosomal bands were excised from the gel. The inferred identity of the chromosomal bands in the PFGE-gel is indicated. To increase the amount of DNA for sequencing, two replicates each for R1-A, R3-A, and R3-I4 were run in the PFGE-gel, and the corresponding chromosomal bands were excised and pooled. B) Results of the Illumina-reads of the DNA from the indicated excised bands mapped on the R3-I4 assembly in 50 kb windows (excluding transposable elements) for chrA (in red), chrB (in blue), and the remaining genome. The top row shows the relative fraction of 50 kb windows covered by at least 5 reads, while the bottom row shows the normalized sequencing coverage (normalized to the sequencing coverage of the contig with the highest average coverage). Both the fraction of bases covered and the normalized sequencing coverage confirm the inferred identity of the chromosomal bands in the case of *M. robertsii* strains R1-A, R3-A and R3-I4. Here, the majority of reads from the excised bands map to the corresponding chromosome and cover large portions. In the case of *M. guizhouense*, two chromosomal bands (large and small accessory chromosome, AC) mainly contain reads that map to chrA, thus confirming the disomy of this chromosome in *M. guizhouense*. Please note that, in agreement with the results of the phylogenetic analysis (Fig. S6), we found some chrB sequences in *M. guizhouense* (small AC). However, their presence is at low coverage (both in terms of the fraction of covered bases and normalized sequencing coverage), and may be due to non-perfect separation during PFGE, rather than their presence in the chromosome represented by the chromosomal band. Moreover, the low amount of DNA has resulted in a low total sequencing coverage (given above the graph), which may have affected the fraction of covered bases, possibly leading to artifacts in the low-coverage 50kb windows. Outliers with normalized sequencing coverage >3 have been excluded from the graph for visual clarity. The supplementary data S1 contains all data.



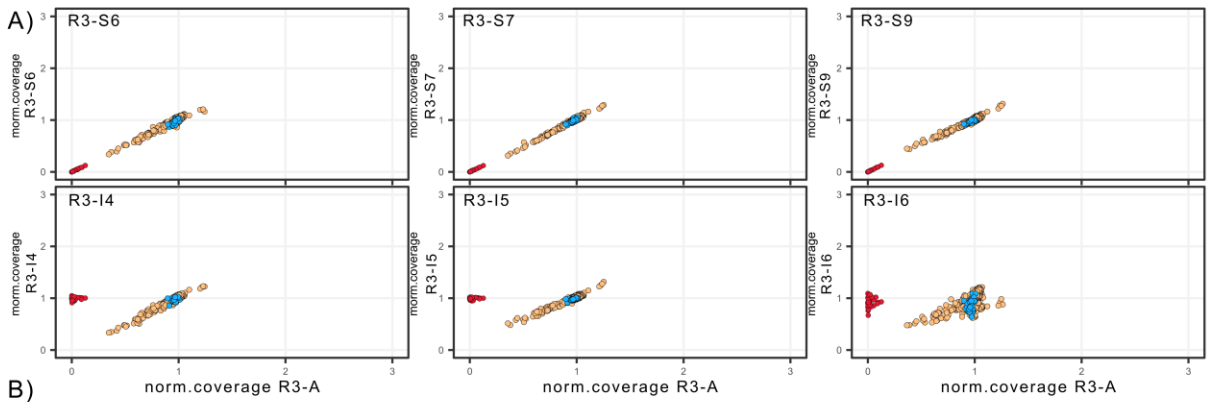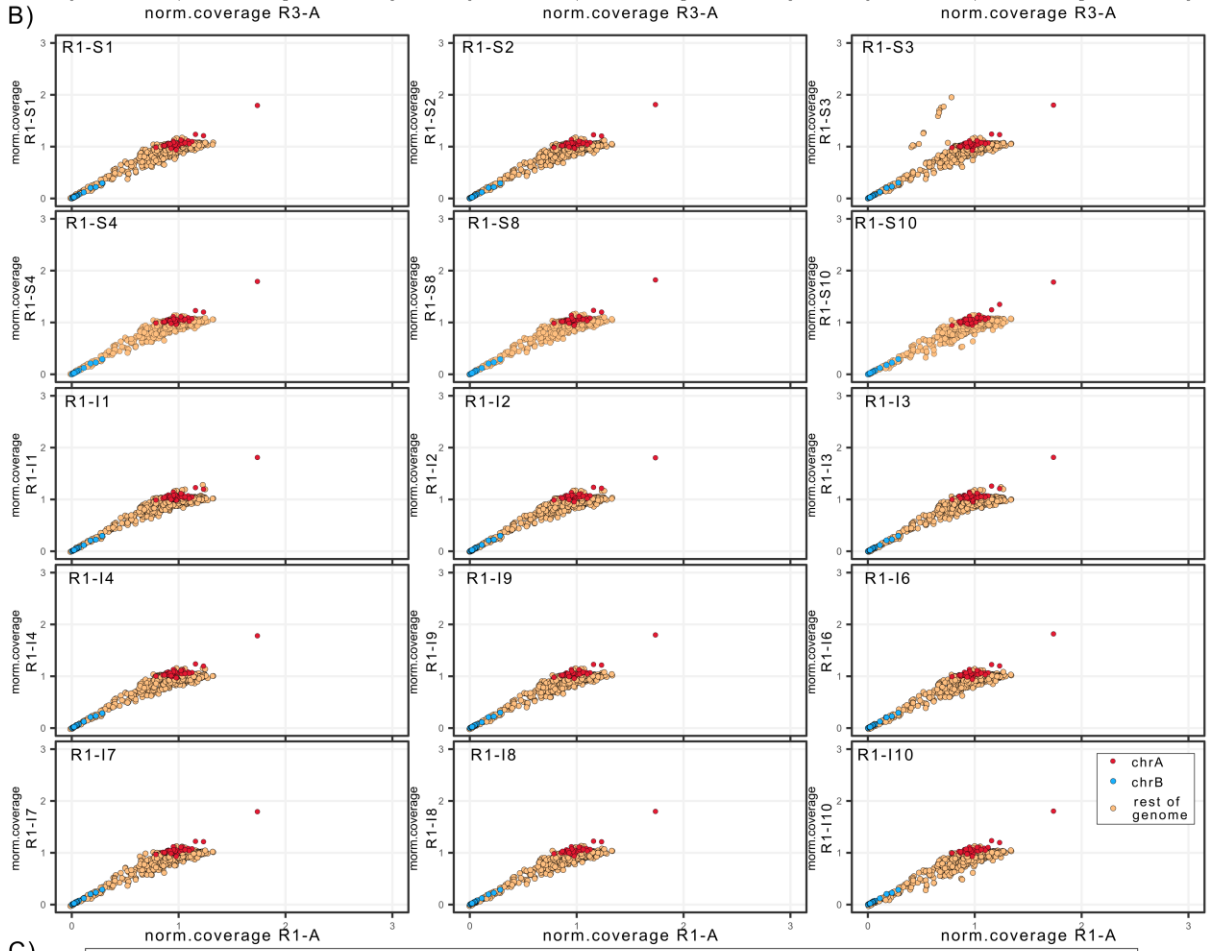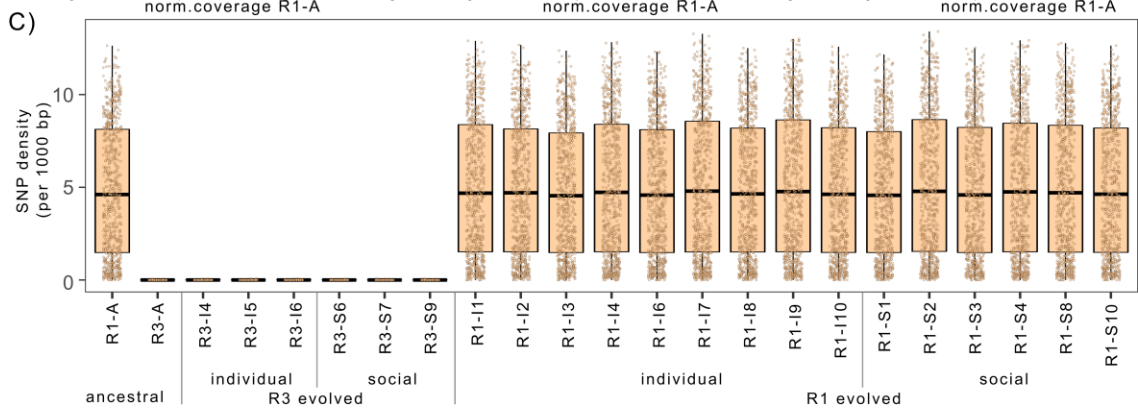

**Fig. S4.** Coverage analysis and SNP/InDel distribution failed to detect horizontal transfer of genetic material in addition to chrA. Illumina sequence coverage analysis of the A) evolved R3 strains compared to the coverage of the ancestral R3-A strain or the B) evolved R1 strains compared to the coverage of the ancestral R1-A strain. With the exception of chrA for the individually-evolved R3 strains, no change in sequence coverage was detected. C) Distribution of SNPs/InDels that are specific to the R1-A (present in the R1-A but absent in the R3-A). No 50 kb windows in the evolved R3 lines showed increased SNP density. Hence no large-scale transfer of genetic material, in addition to chrA, occurred from the ancestral R1-A strain to the evolved R3 strains. In the evolved R1 strains, there was no change in the distribution of SNPs/InDels compared to the ancestral R1-A strain, indicating that no large-scale transfer of genetic material to the evolved R1 strains occurred. Note that the rDNA cluster was excluded from the analysis for visual clarity due to its high coverage.

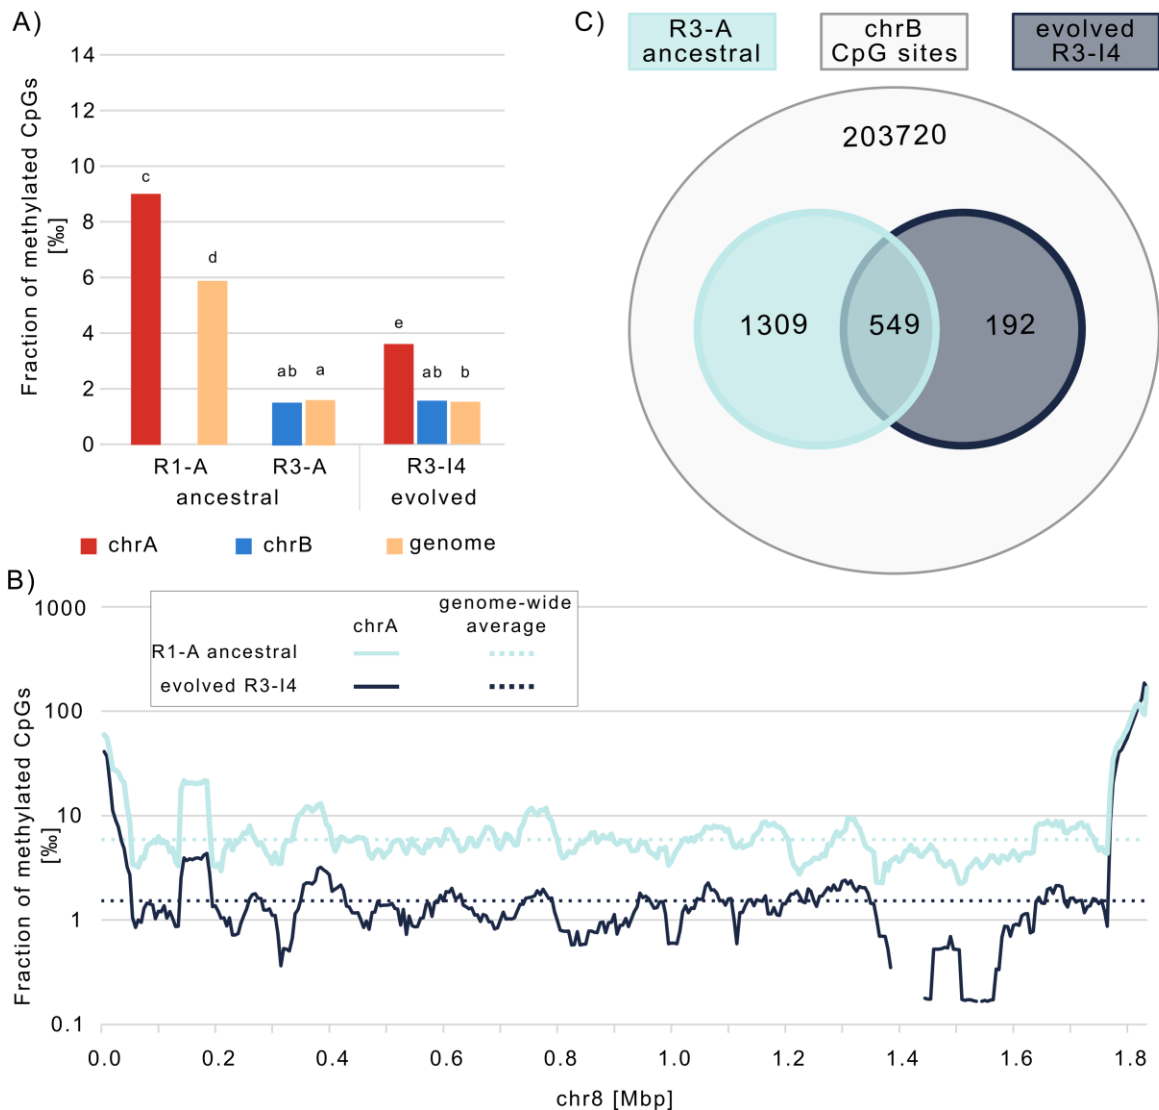

**Fig. S5.** The methylation pattern differed between ancestral R1-A and R3-A strains. ChrA retained part of the ancestral methylation pattern after horizontal transfer from R1-A to R3-A. A) Fraction of methylated cytosines in CpG contexts for chrA, chrB and the rest of the genome in the ancestral R1-A and R3-A strains and the evolved R3-I4 strain. ChrA showed higher methylation in both the ancestral R1-A strain and the evolved R3-I4 strain than chrB and the rest of the genome (identical letters above groups indicate non-significance at  $\alpha < 0.05$  determined by Fisher exact test with BH-adjustment for multiple testing). B) Fraction of methylated cytosines in CpG contexts in 50kb windows (sliding: 5 kb) along chrA for the ancestral R1-A (turquoise) and evolved R3-I4 (dark-grey) strains. C) Venn diagram showing the overlap of highly methylated CpG sites (>25%)

methylation) of chrA (total number CpG sites 203720) between the ancestral R1-A and the evolved R3-I4 strain.

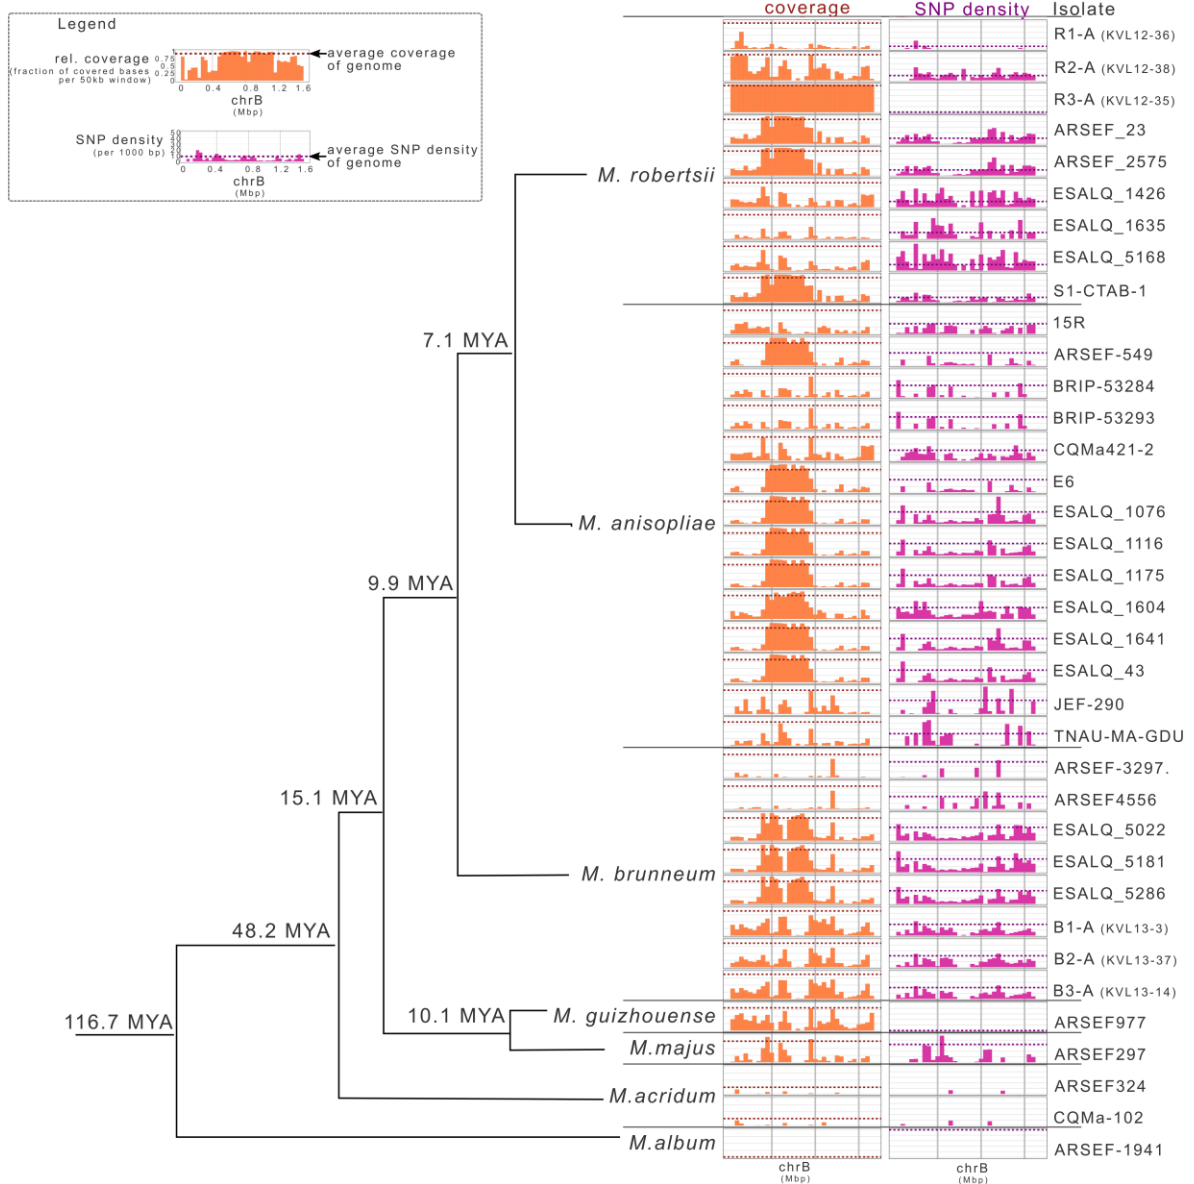

**Fig. S6.** Presence/absence polymorphism of chrB in published genomes of species of the genus *Metarhizium*. Phylogeny and distribution of relative sequence coverage (fraction of bases covered in 50 kb windows) in orange and SNP density per 1000 bp in 50 kb windows in pink, with the respective genome-wide averages shown as dotted lines. Note: TEs were excluded from the analysis. Phylogeny adapted from published Hu and colleagues, 2014 (41). MYA: Million years ago.

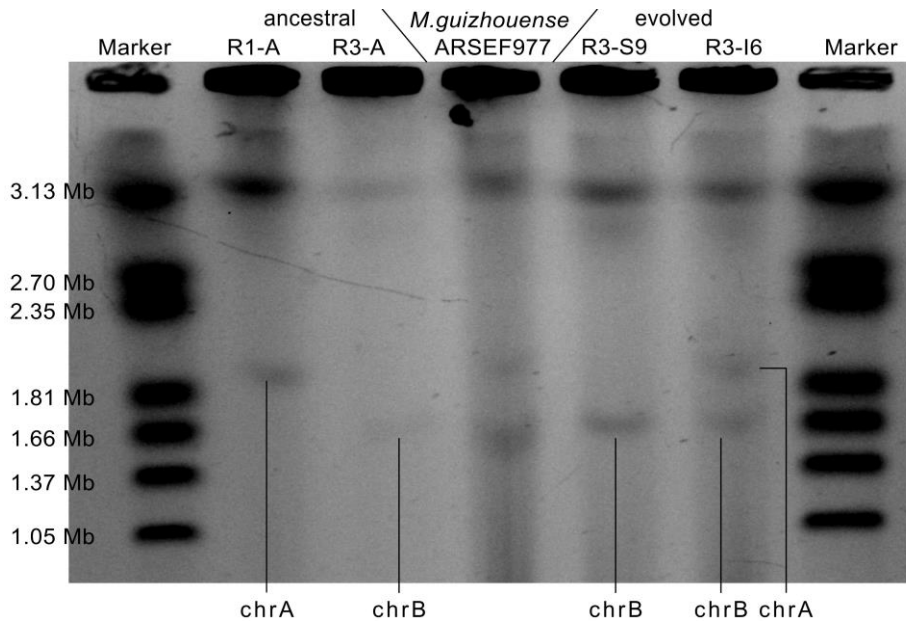

**Fig. S7.** PFGE-gel of *M. guizhouense* ARSEF977 in comparison to the ancestral *M. robertsii* strains R1-A and R3-A, as well as two evolved R3 strains R3-S9 (lacking chrA) and R3-I6 (including chrA).

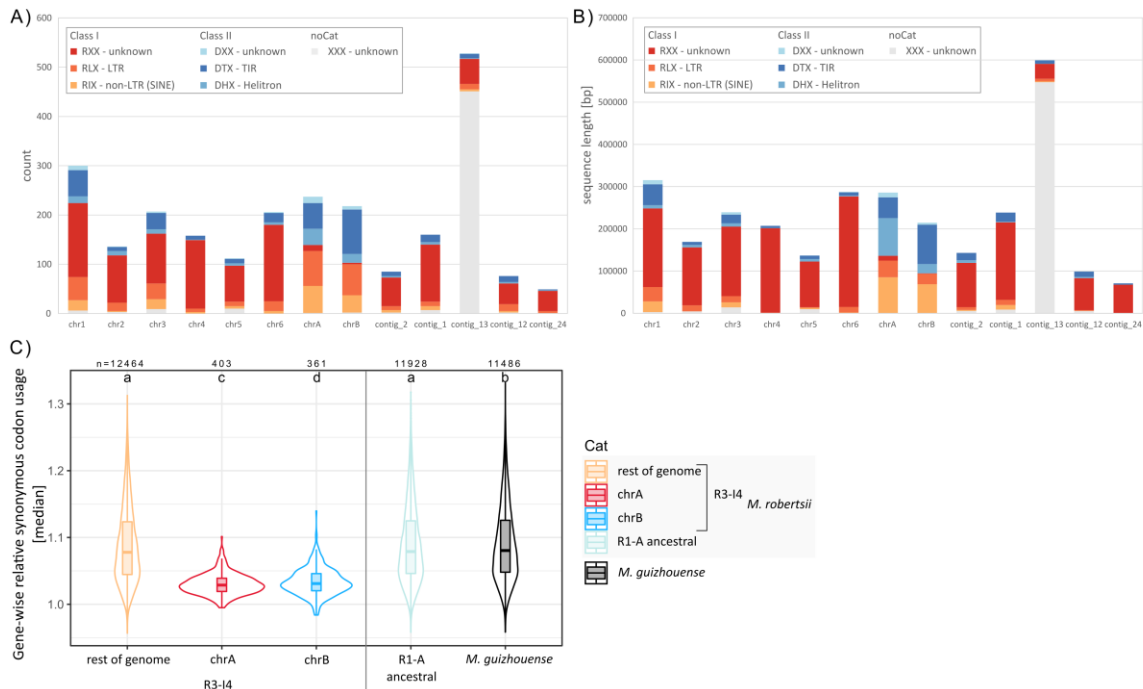

**Fig. S8.** TE composition and codon usage of the accessory chromosomes chrA and chrB differs from the rest of the genome. A) Number and B) cumulative sequence length of the indicated TE classes and orders of the *M. robertsii* R3-I4 strain. ChrA and chrB have a higher proportion of Class I retrotransposons of LTR and SINE order and virtually lack the unknown order of the Class I retrotransposons that dominates (dark-red) in the other chromosomes. C) Gene-wise relative synonymous codon usage for genes located on chrA and chrB compared to genes located on the rest of the R3-I4 genome and R1-A and the *M. guizhouense* ARSEF977 genomes. Identical letters above the individual plots indicate that the respective groups were not significantly different (pairwise Wilcoxon rank-sum tests with BH correction,  $\alpha=0.05$ ).

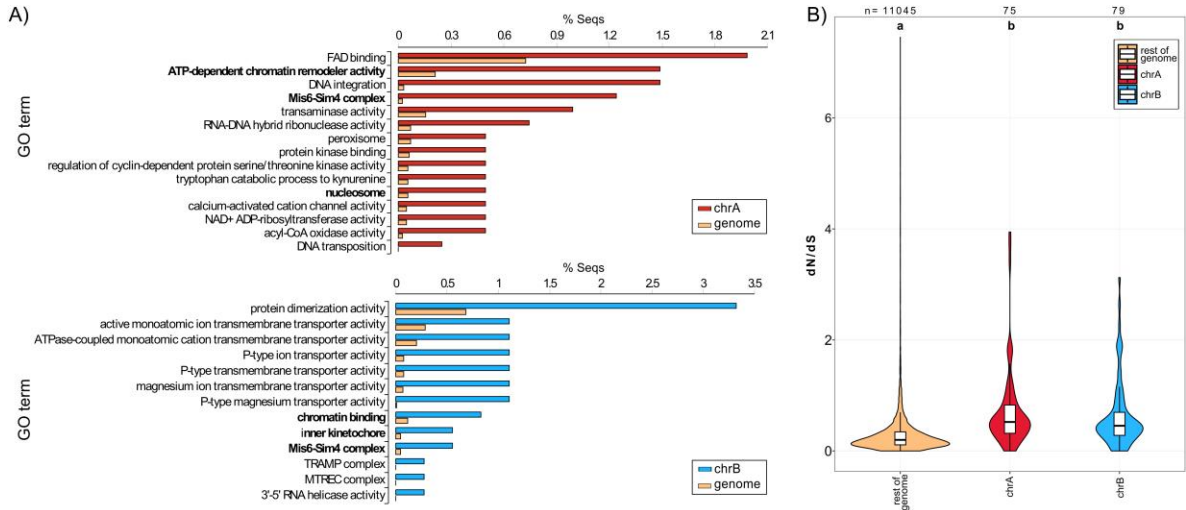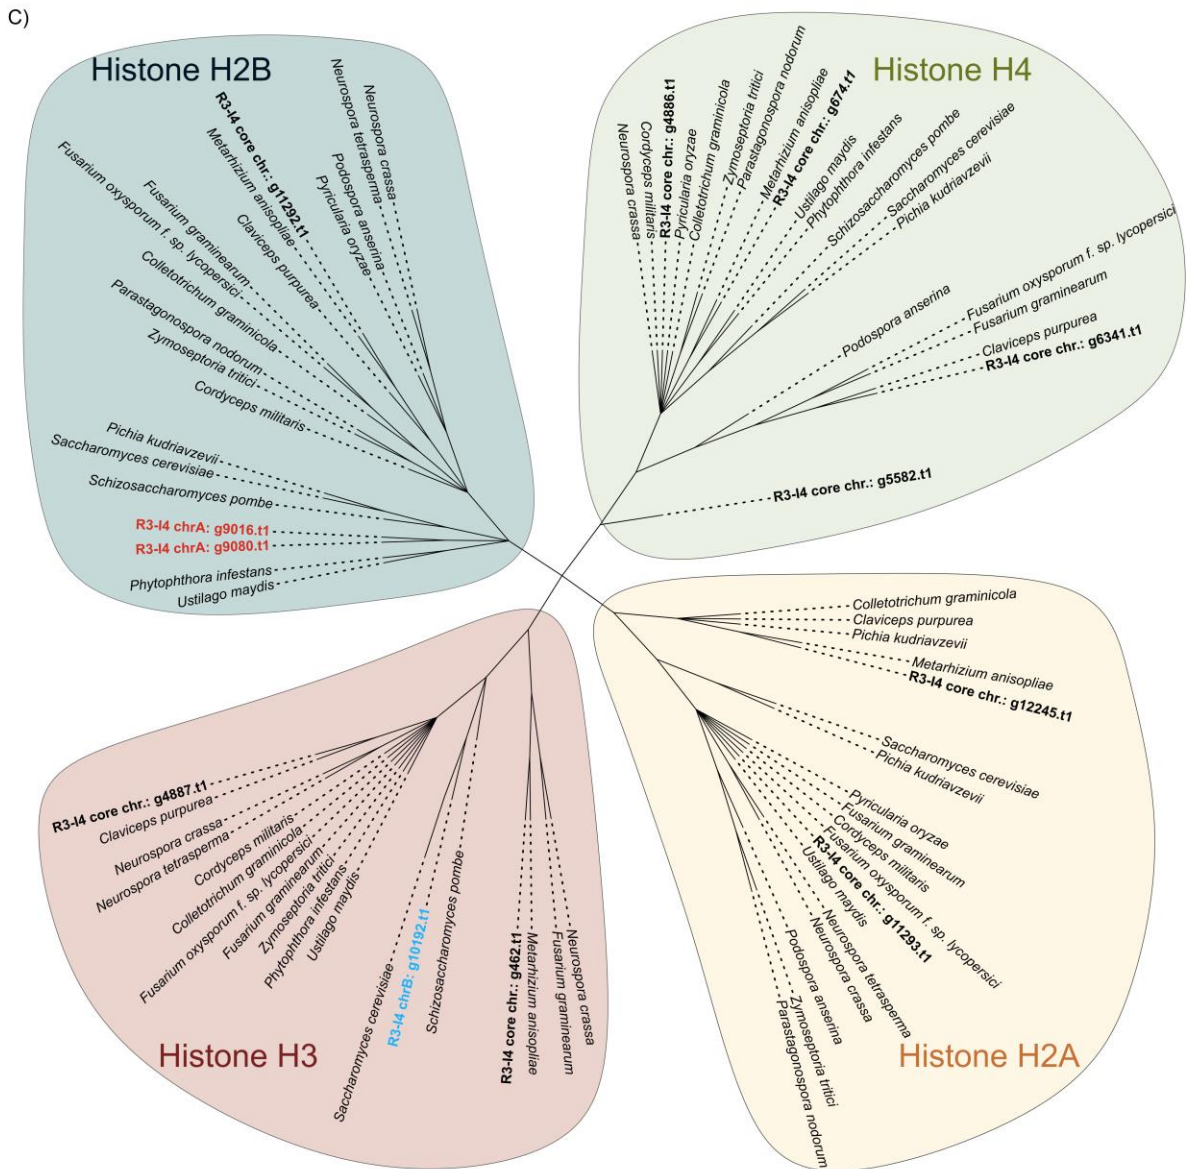

**Fig. S9.** GO-term enrichment, dN/dS ratio and phylogeny of histones located on the accessory chromosomes chrA and chrB. A) Significantly enriched GO terms (at  $\alpha=0.05$ ) for genes located on chrA (in red) and chrB (in blue). GO terms associated with chromatin, nucleosome, and/or chromosome segregation are highlighted in bold. B) Box- and Violin-plot of gene-wise dN/dS ratio for all genes located on chrA (in red), chrB (in blue), and the rest of the genome (in yellow) between *M. robertsii* R3-I4 and *M. guizhouense* ARSEF977. Identical letters above the individual plots indicate that the respective groups were not significantly different (pairwise Wilcoxon rank-sum tests with BH correction,  $\alpha=0.05$ ). C) Unrooted phylogenetic tree of the four core histones (H2A, H2B, H3 and H4) for the putative histone-encoding genes in *M. robertsii* R3-I4 and the correspondingly annotated genes in 16 fungi and one oomycete. Genes located on the accessory chrA are highlighted in red, those on chrB are highlighted in blue, and those located on the core chromosomes of *M. robertsii* are highlighted in bold. The putative histone-encoding genes located on chrA and chrB are not paralogues of the corresponding histone-encoding genes located on the core chromosomes of *M. robertsii* R3-I4.



## 2. Tables S1 to S7

**Table S1:** Comparison statistics of Nanopore-based assemblies

| Strain | Type                 | Contig    | Chr.                                                                 | Length<br>(bp) | GC%  | Median<br>ReadDepth | # Start<br>Telomeres | # End<br>Telomeres | Unique<br>Bases | Unique% | Syntenic<br>to chrA<br>in R3-I4 |
|--------|----------------------|-----------|----------------------------------------------------------------------|----------------|------|---------------------|----------------------|--------------------|-----------------|---------|---------------------------------|
|        |                      |           | (chr1-7:<br>based on<br>synteny to<br><i>M.</i><br><i>brunneum</i> ) |                |      |                     |                      |                    |                 |         |                                 |
| R3-I4  | individually-evolved | contig_16 | chr1                                                                 | 10465571       | 51.1 | 44.3                | 1                    | 1                  | 10026287        | 96      |                                 |
| R3-I4  | individually-evolved | contig_20 | chr2                                                                 | 7387335        | 51.3 | 45.4                | 2                    | 0                  | 7160197         | 97      |                                 |
| R3-I4  | individually-evolved | contig_3  | chr3                                                                 | 4807498        | 50   | 42.4                | 1                    | 0                  | 4161460         | 87      |                                 |
| R3-I4  | individually-evolved | contig_7  | chr6                                                                 | 4615637        | 49.7 | 44.1                | 1                    | 1                  | 4357934         | 94      |                                 |
| R3-I4  | individually-evolved | contig_14 | chr5                                                                 | 4319916        | 50.9 | 44.7                | 1                    | 1                  | 4231323         | 98      |                                 |
| R3-I4  | individually-evolved | contig_6  | chr4                                                                 | 4300840        | 49.9 | 45.5                | 0                    | 1                  | 4140497         | 96      |                                 |
| R3-I4  | individually-evolved | contig_18 | chrA                                                                 | 1832736        | 50   | 42.5                | 3                    | 3                  | 726620          | 40      |                                 |
| R3-I4  | individually-evolved | contig_19 | chrB                                                                 | 1619728        | 49.8 | 43.6                | 3                    | 1                  | 962047          | 59      |                                 |
| R3-I4  | individually-evolved | contig_2  | chr7                                                                 | 1477798        | 48.5 | 44.8                | 1                    | 1                  | 1279223         | 87      |                                 |
| R3-I4  | individually-evolved | contig_1  | chr7                                                                 | 1328681        | 46.2 | 43.7                | 25                   | 0                  | 1200979         | 90      |                                 |
| R3-I4  | individually-evolved | contig_13 | -                                                                    | 1268002        | 49   | 42.6                | 0                    | 0                  | 514021          | 41      |                                 |
| R3-I4  | individually-evolved | contig_12 | -                                                                    | 823663         | 47.3 | 39.3                | 1                    | 1                  | 573669          | 70      |                                 |
| R3-I4  | individually-evolved | contig_24 | -                                                                    | 587825         | 48.3 | 40.4                | 0                    | 24                 | 521764          | 89      |                                 |
| R3-I4  | individually-evolved | contig_5  | -                                                                    | 118431         | 49   | 41.3                | 0                    | 1                  | 35854           | 30      |                                 |
| R3-I4  | individually-evolved | contig_4  | -                                                                    | 42546          | 48   | 68.2                | 0                    | 0                  | 1596            | 4       |                                 |
| R3-I4  | individually-evolved | contig_31 | -                                                                    | 13566          | 49   | 57.9                | 0                    | 0                  | 4340            | 32      |                                 |
| R3-A   | ancestral            | contig_9  |                                                                      | 10479110       | 51.1 | 47.9                | 1                    | 3                  | 10045194        | 96      |                                 |
| R3-A   | ancestral            | contig_15 |                                                                      | 7382587        | 51.3 | 49.1                | 2                    | 0                  | 7173378         | 97      |                                 |
| R3-A   | ancestral            | contig_1  |                                                                      | 4812484        | 50   | 46.7                | 1                    | 0                  | 4178569         | 87      |                                 |
| R3-A   | ancestral            | contig_2  |                                                                      | 4319998        | 50.9 | 46.9                | 1                    | 2                  | 4238826         | 98      |                                 |

|      |           |           |         |      |      |    |    |         |    |     |
|------|-----------|-----------|---------|------|------|----|----|---------|----|-----|
| R3-A | ancestral | contig_23 | 3646070 | 50.7 | 46.9 | 0  | 0  | 3570947 | 98 |     |
| R3-A | ancestral | contig_8  | 2774337 | 51.2 | 48.7 | 26 | 0  | 2684941 | 97 |     |
| R3-A | ancestral | contig_13 | 1613873 | 49.8 | 43.7 | 0  | 2  | 1169465 | 72 |     |
| R3-A | ancestral | contig_5  | 1386847 | 49   | 43.4 | 1  | 0  | 551284  | 40 |     |
| R3-A | ancestral | contig_16 | 1325639 | 46.2 | 42.6 | 25 | 0  | 1211252 | 91 |     |
| R3-A | ancestral | contig_18 | 1230992 | 49   | 45   | 0  | 0  | 1131971 | 92 |     |
| R3-A | ancestral | contig_12 | 1165225 | 49   | 46.7 | 1  | 0  | 1072860 | 92 |     |
| R3-A | ancestral | contig_6  | 861996  | 47.3 | 45.7 | 3  | 0  | 598882  | 69 |     |
| R3-A | ancestral | contig_17 | 640873  | 44.7 | 36.6 | 1  | 1  | 600832  | 94 |     |
| R3-A | ancestral | contig_7  | 629488  | 47.3 | 38.4 | 3  | 0  | 574862  | 91 |     |
| R3-A | ancestral | contig_25 | 587802  | 48.3 | 41.1 | 0  | 26 | 521944  | 89 |     |
| R3-A | ancestral | contig_3  | 248960  | 45.7 | 32.6 | 0  | 0  | 156642  | 63 |     |
| R3-A | ancestral | contig_19 | 30752   | 48.7 | 40.9 | 0  | 0  | 1       | 0  |     |
| R3-A | ancestral | contig_10 | 26233   | 47.2 | 45   | 0  | 0  | 5487    | 21 |     |
| R1-A | ancestral | contig_1  | 7267018 | 51   | 43.7 | 25 | 0  | 7160995 | 99 |     |
| R1-A | ancestral | contig_29 | 7120443 | 50.5 | 45   | 0  | 15 | 6929065 | 97 |     |
| R1-A | ancestral | contig_28 | 4444060 | 50   | 44.5 | 0  | 25 | 4266863 | 96 |     |
| R1-A | ancestral | contig_66 | 4406720 | 49.4 | 42.5 | 21 | 24 | 4324693 | 98 |     |
| R1-A | ancestral | contig_67 | 4139298 | 49.3 | 43.7 | 8  | 14 | 3973138 | 96 |     |
| R1-A | ancestral | contig_27 | 3863933 | 49.9 | 44.9 | 0  | 0  | 3709959 | 96 |     |
| R1-A | ancestral | contig_2  | 2994606 | 51.4 | 44.5 | 23 | 0  | 2917671 | 97 |     |
| R1-A | ancestral | contig_11 | 1389962 | 46.8 | 43.6 | 28 | 0  | 1261440 | 91 |     |
| R1-A | ancestral | contig_71 | 1130232 | 45.7 | 39.7 | 0  | 1  | 798946  | 71 |     |
| R1-A | ancestral | contig_17 | 1075475 | 49.7 | 42.5 | 1  | 1  | 1002826 | 93 |     |
| R1-A | ancestral | contig_58 | 784453  | 48.2 | 40.8 | 1  | 22 | 751924  | 96 |     |
| R1-A | ancestral | contig_65 | 508985  | 49.7 | 28.5 | 0  | 0  | 33483   | 7  |     |
| R1-A | ancestral | contig_4  | 451755  | 48.9 | 39.6 | 23 | 1  | 430927  | 95 |     |
| R1-A | ancestral | contig_25 | 436588  | 50   | 38.1 | 0  | 0  | 308264  | 71 | yes |

|      |           |           |        |      |      |    |    |        |     |     |
|------|-----------|-----------|--------|------|------|----|----|--------|-----|-----|
| R1-A | ancestral | contig_8  | 383379 | 36.6 | 39   | 0  | 1  | 342110 | 89  |     |
| R1-A | ancestral | contig_23 | 272488 | 50.5 | 39.4 | 2  | 0  | 204004 | 75  | yes |
| R1-A | ancestral | contig_52 | 238311 | 49.8 | 36.3 | 0  | 1  | 183500 | 77  | yes |
| R1-A | ancestral | contig_47 | 192533 | 48.8 | 37.7 | 17 | 1  | 178869 | 93  |     |
| R1-A | ancestral | contig_56 | 188225 | 47.6 | 39   | 3  | 1  | 178771 | 95  |     |
| R1-A | ancestral | contig_6  | 180082 | 47.4 | 42.3 | 0  | 0  | 124287 | 69  |     |
| R1-A | ancestral | contig_10 | 172426 | 50.6 | 44.9 | 0  | 0  | 126783 | 74  | yes |
| R1-A | ancestral | contig_3  | 140387 | 48.7 | 33.6 | 0  | 0  | 82551  | 59  |     |
| R1-A | ancestral | contig_20 | 125788 | 48.8 | 30.7 | 1  | 0  | 63815  | 51  |     |
| R1-A | ancestral | contig_50 | 112477 | 42   | 33.7 | 0  | 22 | 79755  | 71  |     |
| R1-A | ancestral | contig_22 | 94572  | 48.7 | 40.8 | 1  | 0  | 57382  | 61  | yes |
| R1-A | ancestral | contig_59 | 90690  | 48.6 | 44   | 0  | 0  | 60573  | 67  |     |
| R1-A | ancestral | contig_51 | 76745  | 48   | 55.2 | 0  | 0  | 76745  | 100 | yes |
| R1-A | ancestral | contig_9  | 74764  | 49.4 | 36   | 0  | 0  | 61366  | 82  |     |
| R1-A | ancestral | contig_63 | 66292  | 49.6 | 41.2 | 0  | 0  | 631    | 1   | yes |
| R1-A | ancestral | contig_38 | 65268  | 50   | 30.8 | 0  | 1  | 1033   | 2   | yes |
| R1-A | ancestral | contig_62 | 44691  | 51.1 | 41.1 | 0  | 0  | 40351  | 90  |     |
| R1-A | ancestral | contig_46 | 39964  | 48.2 | 41.6 | 0  | 0  | 17692  | 44  |     |
| R1-A | ancestral | contig_75 | 37454  | 53.5 | 46.9 | 0  | 1  | 4130   | 11  | yes |
| R1-A | ancestral | contig_44 | 32834  | 51.9 | 48   | 0  | 0  | 4392   | 13  | yes |
| R1-A | ancestral | contig_72 | 30035  | 51.2 | 62.7 | 0  | 0  | 1978   | 7   | yes |
| R1-A | ancestral | contig_15 | 29486  | 49.3 | 35.2 | 0  | 0  | 21194  | 72  |     |
| R1-A | ancestral | contig_64 | 22534  | 49.8 | 56.2 | 1  | 0  | 2012   | 9   |     |
| R1-A | ancestral | contig_76 | 21574  | 48.6 | 40.5 | 0  | 1  | 0      | 0   |     |
| R1-A | ancestral | contig_74 | 9854   | 50.4 | 55.6 | 0  | 1  | 2098   | 21  |     |
| R1-A | ancestral | contig_77 | 7940   | 51.3 | 57   | 2  | 1  | 67     | 1   |     |
| R1-A | ancestral | contig_31 | 4621   | 49.9 | 70.1 | 1  | 0  | 4621   | 100 |     |

**Table S2:** Number of SNPs and small InDels compared to R3-I4 that were not already present in the R3-A ancestral strain

| Type  | treatment group      | Strain           | SNPs/Indels in |        |                |             | SNPs/Indels not present in R3-A in |        |                |             | but present in R1-AI in |        |                |             | of these without any evidence of being present in R3-A |        |                |             |
|-------|----------------------|------------------|----------------|--------|----------------|-------------|------------------------------------|--------|----------------|-------------|-------------------------|--------|----------------|-------------|--------------------------------------------------------|--------|----------------|-------------|
|       |                      |                  | chrA           | chrB   | rest of genome | Grand Total | chrA                               | chrB   | rest of genome | Grand Total | chrA                    | chrB   | rest of genome | Grand Total | chrA                                                   | chrB   | rest of genome | Grand Total |
|       | ancestral            | R1-A             | 0              | 141    | 197200         | 197341      | 0                                  | 141    | 197193         | 197334      | 0                       | 141    | 197193         | 197334      | 0                                                      | 141    | 197185         | 197326      |
|       |                      | R3-A             | 4              | 1      | 24             | 29          | 0                                  | 0      | 0              | 0           | 0                       | 0      | 0              | 0           | 0                                                      | 0      | 0              | 0           |
| R3    | individually-evolved | R3-I4            | 0              | 1      | 15             | 16          | 0                                  | 1      | 4              | 5           | 0                       | 0      | 1              | 1           | 0                                                      | 0      | 0              | 0           |
|       |                      | R3-I5            | 0              | 0      | 36             | 36          | 0                                  | 0      | 15             | 15          | 0                       | 0      | 7              | 7           | 0                                                      | 0      | 1*             | 1*          |
|       |                      | R3-I6            | 0              | 0      | 36             | 36          | 0                                  | 0      | 18             | 18          | 0                       | 0      | 6              | 6           | 0                                                      | 0      | 0              | 0           |
|       | socially-evolved     | R3-S9            | 0              | 2      | 31             | 33          | 0                                  | 2      | 15             | 17          | 0                       | 0      | 4              | 4           | 0                                                      | 0      | 0              | 0           |
|       |                      | R3-S6            | 3              | 1      | 31             | 35          | 1                                  | 1      | 14             | 16          | 0                       | 0      | 3              | 3           | 0                                                      | 0      | 1*             | 1*          |
|       |                      | R3-S7            | 4              | 0      | 25             | 29          | 2                                  | 0      | 11             | 13          | 0                       | 0      | 2              | 2           | 0                                                      | 0      | 0              | 0           |
| R1    | individually-evolved | R1-I1            | 0              | 164    | 205206         | 205370      | 0                                  | 164    | 205198         | 205362      | 0                       | 129    | 189920         | 190049      | 0                                                      | 129    | 189916         | 190045      |
|       |                      | R1-I2            | 0              | 160    | 202184         | 202344      | 0                                  | 160    | 202176         | 202336      | 0                       | 132    | 189115         | 189247      | 0                                                      | 132    | 189112         | 189244      |
|       |                      | R1-I3            | 0              | 158    | 196293         | 196451      | 0                                  | 158    | 196284         | 196442      | 0                       | 133    | 185832         | 185965      | 0                                                      | 133    | 185826         | 185959      |
|       |                      | R1-I4            | 0              | 182    | 206340         | 206522      | 0                                  | 182    | 206332         | 206514      | 0                       | 135    | 190830         | 190965      | 0                                                      | 135    | 190823         | 190958      |
|       |                      | R1-I6            | 0              | 171    | 199513         | 199684      | 0                                  | 171    | 199506         | 199677      | 0                       | 131    | 187689         | 187820      | 0                                                      | 131    | 187685         | 187816      |
|       |                      | R1-I7            | 0              | 202    | 210943         | 211145      | 0                                  | 202    | 210934         | 211136      | 0                       | 135    | 192274         | 192409      | 0                                                      | 135    | 192269         | 192404      |
|       |                      | R1-I8            | 1              | 156    | 201985         | 202142      | 1                                  | 156    | 201978         | 202135      | 0                       | 126    | 188748         | 188874      | 0                                                      | 126    | 188743         | 188869      |
|       |                      | R1-I9            | 0              | 186    | 211198         | 211384      | 0                                  | 186    | 211189         | 211375      | 0                       | 136    | 192238         | 192374      | 0                                                      | 136    | 192233         | 192369      |
|       |                      | R1-I10           | 0              | 165    | 200522         | 200687      | 0                                  | 165    | 200512         | 200677      | 0                       | 130    | 188376         | 188506      | 0                                                      | 130    | 188368         | 188498      |
|       |                      | socially-evolved | R1-S1          | 0      | 155            | 197095      | 197250                             | 0      | 155            | 197087      | 197242                  | 0      | 126            | 186368      | 186494                                                 | 0      | 126            | 186365      |
| R1-S2 | 0                    |                  | 197            | 213034 | 213231         | 0           | 197                                | 213027 | 213224         | 0           | 137                     | 192947 | 193084         | 0           | 137                                                    | 192943 | 193080         |             |
| R1-S3 | 0                    |                  | 178            | 201364 | 201542         | 0           | 178                                | 201357 | 201535         | 0           | 133                     | 188583 | 188716         | 0           | 133                                                    | 188579 | 188712         |             |
| R1-S4 | 0                    |                  | 181            | 207754 | 207935         | 0           | 181                                | 207746 | 207927         | 0           | 138                     | 191344 | 191482         | 0           | 138                                                    | 191337 | 191475         |             |
| R1-S8 | 0                    |                  | 177            | 205642 | 205819         | 0           | 177                                | 205635 | 205812         | 0           | 134                     | 190603 | 190737         | 0           | 134                                                    | 190599 | 190733         |             |

|        |   |     |        |        |   |     |        |        |   |     |        |        |   |     |        |        |
|--------|---|-----|--------|--------|---|-----|--------|--------|---|-----|--------|--------|---|-----|--------|--------|
| R1-S10 | 1 | 165 | 200027 | 200193 | 1 | 165 | 200020 | 200186 | 0 | 135 | 187999 | 188134 | 0 | 135 | 187998 | 188133 |
|--------|---|-----|--------|--------|---|-----|--------|--------|---|-----|--------|--------|---|-----|--------|--------|

\* InDel at chr5:3,759,062. Wrongly called (based on visual inspection of aligned reads)

**Table S3:** Number of methylated Cytosines in CpG context

| chr/contig of R3-I4<br>assembly | size [bp] | Number of C in CpG context<br>(on both strands) |       | R1-A  |                              | R3-A  |                              | R3-I4 |                              |
|---------------------------------|-----------|-------------------------------------------------|-------|-------|------------------------------|-------|------------------------------|-------|------------------------------|
|                                 |           |                                                 |       | Count | Metfrac [ $\times 10^{-3}$ ] | Count | Metfrac [ $\times 10^{-3}$ ] | Count | Metfrac [ $\times 10^{-3}$ ] |
| chr1                            | 10465571  | 1240792                                         | 7319  | 5.90  | 1545                         | 1.25  | 1411                         | 1.14  |                              |
| chr2                            | 7387335   | 879786                                          | 5570  | 6.33  | 1120                         | 1.27  | 1082                         | 1.23  |                              |
| chr3                            | 4807498   | 550886                                          | 3018  | 5.48  | 680                          | 1.23  | 649                          | 1.18  |                              |
| chr6                            | 4615637   | 525614                                          | 3345  | 6.36  | 720                          | 1.37  | 689                          | 1.31  |                              |
| chr5                            | 4319916   | 509060                                          | 3096  | 6.08  | 735                          | 1.44  | 729                          | 1.43  |                              |
| chr4                            | 4300840   | 495058                                          | 3089  | 6.24  | 678                          | 1.37  | 653                          | 1.32  |                              |
| chrA                            | 1832736   | 205770                                          | 1858  | 9.03  |                              |       | 741                          | 3.60  |                              |
| chrB                            | 1619728   | 179874                                          | 27    | 0.15  | 277                          | 1.54  | 281                          | 1.56  |                              |
| contig_2                        | 1477798   | 162308                                          | 849   | 5.23  | 280                          | 1.73  | 245                          | 1.51  |                              |
| contig_1                        | 1328681   | 137250                                          | 722   | 5.26  | 209                          | 1.52  | 192                          | 1.40  |                              |
| contig_13                       | 1268002   | 127278                                          | 590   | 4.64  | 1624                         | 12.76 | 1421                         | 11.16 |                              |
| contig_12                       | 823663    | 89124                                           | 317   | 3.56  | 140                          | 1.57  | 155                          | 1.74  |                              |
| contig_24                       | 587825    | 66852                                           | 414   | 6.19  | 83                           | 1.24  | 82                           | 1.23  |                              |
| contig_5                        | 118431    | 12986                                           | 22    | 1.69  | 39                           | 3.00  | 31                           | 2.39  |                              |
| contig_4                        | 42546     | 4394                                            | 2     | 0.46  | 10                           | 2.28  | 4                            | 0.91  |                              |
| contig_31                       | 13566     | 1344                                            | 0     | 0     | 1                            | 0.74  | 1                            | 0.74  |                              |
| chrA                            | 1832736   | 205770                                          | 1858  | 9.03  | n.d.                         | n.d.  | 741                          | 3.60  |                              |
| chrB                            | 1619728   | 179874                                          | 27    | 0.15  | 277                          | 1.54  | 281                          | 1.56  |                              |
| rest of genome                  | 41557309  | 4802732                                         | 28353 | 5.90  | 7864                         | 1.64  | 7344                         | 1.53  |                              |

**Table S4:** Overview of previously published Assemblies and Reads included in this study

| Species              | Strain              | Location    | BioSample    | Assembly<br>Accession | N75<br>(assembly) | assembly<br>size [bp] | Sequencing<br>run |
|----------------------|---------------------|-------------|--------------|-----------------------|-------------------|-----------------------|-------------------|
| <i>M. robertsii</i>  | KVL12-36 (C17) = R1 | Denmark     | SAMN37404239 |                       |                   |                       | SRR26068569       |
| <i>M. robertsii</i>  | KVL12-35 (E81) = R2 | Denmark     | SAMN37404240 |                       |                   |                       | SRR26068568       |
| <i>M. robertsii</i>  | KVL12-38 (F19) = R3 | Denmark     | SAMN37404241 |                       |                   |                       | SRR26068557       |
| <i>M. robertsii</i>  | ARSEF 23            | USA         | SAMN20219665 |                       |                   |                       | SRR15182435       |
| <i>M. robertsii</i>  | ARSEF 2575          | USA         | SAMN20219666 |                       |                   |                       | SRR15182434       |
| <i>M. robertsii</i>  | ESALQ 1426          | Brazil      | SAMN20243868 |                       |                   |                       | SRR15182431       |
| <i>M. robertsii</i>  | ESALQ 1635          | Brazil      | SAMN20243869 |                       |                   |                       | SRR15182430       |
| <i>M. robertsii</i>  | ESALQ 5168          | Brazil      | SAMN20219667 |                       |                   |                       | SRR15182429       |
| <i>M. robertsii</i>  | S1-CTAB-1           | China       | SAMN21033591 |                       |                   |                       | SRR15665281       |
| <i>M. anisopliae</i> | 15R                 | Korea       | SAMN26650411 |                       |                   |                       | SRR18320042       |
| <i>M. anisopliae</i> | ARSEF-549           | Brazil      | SAMN03268434 | GCA_000814975.1       | 1007133           | 38504274              |                   |
| <i>M. anisopliae</i> | BRIP-53284          |             | SAMN02981522 | GCA_000426985.1       | 99853             | 38088637              |                   |
| <i>M. anisopliae</i> | BRIP-53293          | Australia   | SAMN02981521 | GCA_000426965.1       | 32194             | 38672492              |                   |
| <i>M. anisopliae</i> | CQMa421-2           | China       | SAMN15446573 |                       |                   |                       | SRR12224770       |
| <i>M. anisopliae</i> | E6                  | Brazil      | SAMN02840975 | GCA_000739145.1       | 319537            | 38477109              |                   |
| <i>M. anisopliae</i> | ESALQ 1076          | Brazil      | SAMN20243862 |                       |                   |                       | SRR15182425       |
| <i>M. anisopliae</i> | ESALQ 1116          | Brazil      | SAMN20219669 |                       |                   |                       | SRR15182427       |
| <i>M. anisopliae</i> | ESALQ 1175          | Brazil      | SAMN20243863 |                       |                   |                       | SRR15182424       |
| <i>M. anisopliae</i> | ESALQ 1604          |             | SAMN20243864 |                       |                   |                       | SRR15182423       |
| <i>M. anisopliae</i> | ESALQ 1641          | Brazil      | SAMN20219670 |                       |                   |                       | SRR15182426       |
| <i>M. anisopliae</i> | ESALQ 43            | Brazil      | SAMN20219668 |                       |                   |                       | SRR15182428       |
| <i>M. anisopliae</i> | JEF-290             | South Korea | SAMN11321365 | GCA_013305495.1       | 6254943           | 42848098              |                   |
| <i>M. anisopliae</i> | TNAU-MA-GDU         | India       | SAMN26879068 | GCA_023212845.1       | 193594            | 39437477              |                   |
| <i>M. brunneum</i>   | ARSEF-3297          | Mexico      | SAMN03268432 | GCF_000814965.1       | 943571            | 37066166              |                   |

|                       |                      |            |              |                 |         |             |
|-----------------------|----------------------|------------|--------------|-----------------|---------|-------------|
| <i>M. brunneum</i>    | ARSEF 4556           | USA        | SAMN14166897 |                 |         | SRR11149706 |
| <i>M. brunneum</i>    | ESALQ 5022           | Brazil     | SAMN20243865 |                 |         | SRR15182422 |
| <i>M. brunneum</i>    | ESALQ 5181           | Brazil     | SAMN20243866 |                 |         | SRR15182433 |
| <i>M. brunneum</i>    | ESALQ 5286           | Brazil     | SAMN20243867 |                 |         | SRR15182432 |
| <i>M. brunneum</i>    | KVL13-13 (G39) =B1   | Denmark    | SAMN37404242 |                 |         | SRR26068546 |
| <i>M. brunneum</i>    | KVL12-37 (J65) = B2  | Denmark    | SAMN37404243 |                 |         | SRR26068541 |
| <i>M. brunneum</i>    | KVL13-14 (L105) = B3 | Denmark    | SAMN37404244 |                 |         | SRR26068540 |
| <i>M. guizhouense</i> | ARSEF977             | France     | SAMN03268433 | GCA_000814955.1 | 317737  | 43465197    |
| <i>M. majus</i>       | ARSEF297             | Samoa      | SAMN03268436 | GCF_000814945.1 | 99788   | 42062993    |
| <i>M. acridum</i>     | ARSEF324             | Australia  | SAMN18235592 | GCA_019434415.1 | 2337527 | 44714781    |
| <i>M. acridum</i>     | CQMa-102             |            | SAMN02981259 | GCF_000187405.1 | 54747   | 39422329    |
| <i>M. album</i>       | ARSEF-1941           | Philipines | SAMN03268435 | GCF_000804445.1 | 238756  | 30449065    |



**Table S5:** Number and phases of SNPs and InDels in *M. guizhouense* ARSEF977 on the *M. robertsii* R3-I4 assembly.

| chr/contig | Contig size [bp] | homozygous<br>SNPs/InDels | heterozygous SNPs/InDels |      |     | Total<br>SNPs/InDels | Average<br>coverage<br>[per site] | Sites<br>(excluding<br>TEs) [bp] | Average SNP<br>density [per<br>1 kb] |
|------------|------------------|---------------------------|--------------------------|------|-----|----------------------|-----------------------------------|----------------------------------|--------------------------------------|
|            |                  | 1/1                       | 0/1                      | 0 1  | 1 0 |                      |                                   |                                  |                                      |
| chr1       | 10465571         | 206718                    | 99                       | 293  | 338 | 207448               | 0.873                             | 10002236                         | 20.7                                 |
| chr2       | 7387335          | 150103                    | 62                       | 209  | 182 | 150556               | 0.888                             | 7143658                          | 21.1                                 |
| chr3       | 4807498          | 81897                     | 29                       | 34   | 77  | 82037                | 0.749                             | 4461518                          | 18.4                                 |
| chr6       | 4615637          | 82468                     | 39                       | 34   | 122 | 82663                | 0.833                             | 4284019                          | 19.3                                 |
| chr5       | 4319916          | 87469                     | 45                       | 27   | 45  | 87586                | 0.865                             | 4160338                          | 21.1                                 |
| chr4       | 4300840          | 84871                     | 32                       | 41   | 106 | 85050                | 0.855                             | 4088191                          | 20.8                                 |
| chrA       | 1832736          | 9                         | 6                        | 2790 | 294 | 3099                 | 1.000                             | 1265300                          | 2.4                                  |
| chrB       | 1619728          | 2613                      | 15                       | 262  | 183 | 3073                 | 0.326                             | 1093624                          | 2.8                                  |
| contig_2   | 1477798          | 22832                     | 5                        | 33   | 37  | 22907                | 0.751                             | 1315475                          | 17.4                                 |
| contig_1   | 1328681          | 15953                     | 6                        | 2    | 5   | 15966                | 0.545                             | 1084083                          | 14.7                                 |
| contig_13  | 1268002          | 4120                      | 3                        | 8    | 1   | 4132                 | 0.481                             | 726023                           | 5.7                                  |
| contig_12  | 823663           | 9380                      | 2                        | 23   | 8   | 9413                 | 0.497                             | 663248                           | 14.2                                 |
| contig_24  | 587825           | 10841                     | 2                        |      |     | 10843                | 0.754                             | 495643                           | 21.9                                 |
| contig_5   | 118431           | 213                       | 1                        | 12   | 10  | 236                  | nd                                | 100294                           | 2.4                                  |
| contig_4   | 42546            | 13                        |                          | 1    | 1   | 15                   | nd                                | 37130                            | 0.4                                  |

**Table S6:** Comparison of genome annotations.

| Strain | Compartment                      | size [bp] | genes | transcripts | SignalP | EffectorP | Secondary Metabolite cluster (AntiSmash6.0) | CAZyme (GH) | GH18 | Chitinases |
|--------|----------------------------------|-----------|-------|-------------|---------|-----------|---------------------------------------------|-------------|------|------------|
| R3-I4  | chrA                             | 1832736   | 364   | 403         | 30      | 13        | 0                                           | 10          | 5    | 3          |
| R3-I4  | chrB                             | 1619728   | 328   | 361         | 38      | 8         | 1                                           | 7           | 2    | 1          |
| R3-I4  | genome (excluding chrA and chrB) | 41557309  | 11803 | 12464       | 1317    | 370       | 62                                          | 195         | 26   | 17         |
| R1-A   | genome                           | 42768942  | 12027 | 12710       | 1344    | 381       | 73                                          | 201         | 27   | 18         |
| R3-A   | genome                           | 43163266  | 12254 | 12962       | 1365    | 380       | 63                                          | 200         | 28   | 18         |

**Table S7:** Overview of sequencing information generated within this study

| ID     | Experimental ID<br>(as in Stock et al 2023) | Type                 | Strain | Strain ID       | Illumina Sequencing<br>2*150 bp PE-Reads | Long read sequencing Sequencing |        |
|--------|---------------------------------------------|----------------------|--------|-----------------|------------------------------------------|---------------------------------|--------|
|        |                                             |                      |        |                 |                                          | Nanopore                        | PacBio |
| R1-A   | R1                                          | field isolate        | C17    | KVL12-36 (C17)  | 22015508                                 | 2496817                         |        |
| R2-A   | R2                                          | field isolate        | E81    | KVL12-35 (E81)  | 22256812                                 |                                 |        |
| R3-A   | R3                                          | field isolate        | F19    | KVL12-38 (F19)  | 19319614                                 | 829861                          |        |
| B1-A   | B1                                          | field isolate        | G39    | KVL13-13 (G39)  | 20194796                                 |                                 |        |
| B2-A   | B2                                          | field isolate        | J65    | KVL12-37 (J65)  | 21682732                                 |                                 |        |
| B3-A   | B3                                          | field isolate        | L105   | KVL13-14 (L105) | 23054504                                 |                                 |        |
| R1-I1  | R1-I1                                       | individually-evolved | C17    |                 | 22225480                                 |                                 |        |
| R1-I2  | R1-I2                                       | individually-evolved | C17    |                 | 22198284                                 |                                 |        |
| R1-I3  | R1-I3                                       | individually-evolved | C17    |                 | 19574520                                 |                                 |        |
| R1-I4  | R1-I4                                       | individually-evolved | C17    |                 | 25471732                                 |                                 |        |
| R3-I4  | R3-I4                                       | individually-evolved | F19    |                 | 19686382                                 | 2619730                         |        |
| R1-I9  | R1-I9                                       | individually-evolved | C17    |                 | 29332410                                 |                                 |        |
| R3-I5  | R3-I5                                       | individually-evolved | F19    |                 | 19893662                                 |                                 |        |
| R1-I6  | R1-I6                                       | individually-evolved | C17    |                 | 20092630                                 |                                 |        |
| R3-I6  | R3-I6                                       | individually-evolved | F19    |                 | 21851188                                 |                                 |        |
| R1-I7  | R1-I7                                       | individually-evolved | C17    |                 | 29468220                                 |                                 |        |
| R1-I8  | R1-I8                                       | individually-evolved | C17    |                 | 22521214                                 |                                 |        |
| R1-I10 | R1-I10                                      | individually-evolved | C17    |                 | 22189218                                 |                                 |        |
| R1-S1  | R1-S1                                       | socially-evolved     | C17    |                 | 20603772                                 |                                 |        |
| R1-S2  | R1-S2                                       | socially-evolved     | C17    |                 | 31655904                                 |                                 |        |
| R1-S3  | R1-S3                                       | socially-evolved     | C17    |                 | 22553034                                 |                                 |        |
| R1-S4  | R1-S4                                       | socially-evolved     | C17    |                 | 25893830                                 |                                 |        |
| R3-S9  | R3-S9                                       | socially-evolved     | F19    |                 | 20853102                                 |                                 |        |
| B2-S9  | B2-S9                                       | socially-evolved     | J65    |                 | 24756712                                 |                                 |        |

|                                                    |        |                  |                       |          |          |         |
|----------------------------------------------------|--------|------------------|-----------------------|----------|----------|---------|
| B2-S5                                              | B2-S5  | socially-evolved | J65                   |          | 19393938 |         |
| R3-S6                                              | R3-S6  | socially-evolved | F19                   |          | 22975156 |         |
| R3-S7                                              | R3-S7  | socially-evolved | F19                   |          | 23254436 |         |
| R1-S8                                              | R1-S8  | socially-evolved | C17                   |          | 24098488 |         |
| B2-S8                                              | B2-S8  | socially-evolved | J65                   |          | 22818934 |         |
| R1-S10                                             | R1-S10 | socially-evolved | C17                   |          | 21397322 |         |
| <i>M. guizhouense</i><br>ARSEF977                  |        | field isolate    | <i>M. guizhouense</i> | ARSEF977 |          | 1214214 |
|                                                    |        | excised PFGE     |                       |          |          |         |
| R1-A chrA                                          |        | chromosomal band |                       |          | 2863910  |         |
|                                                    |        | excised PFGE     |                       |          |          |         |
| R1-B chrB                                          |        | chromosomal band |                       |          | 2594854  |         |
|                                                    |        | excised PFGE     |                       |          |          |         |
| R3-I4 chrA                                         |        | chromosomal band |                       |          | 2139872  |         |
|                                                    |        | excised PFGE     |                       |          |          |         |
| R3-I4 chrB                                         |        | chromosomal band |                       |          | 2364024  |         |
|                                                    |        | excised PFGE     |                       |          |          |         |
| <i>M. guizhouense</i> ARSEF977<br>large chromosome |        | chromosomal band |                       |          | 2475900  |         |
|                                                    |        | excised PFGE     |                       |          |          |         |
| <i>M. guizhouense</i> ARSEF977<br>small chromosome |        | chromosomal band |                       |          | 2171724  |         |

### 3. Supporting text S1. Detailed methods and materials

#### 3.1. Fungal strains and selection experiment outline

This study analyzed 30 fungal lines of the entomopathogenic fungal genera *Metarhizium robertsii* and *brunneum*, six of which had been used as the starting strains of a selection experiment by Stock et al. (1) in ant hosts (ancestral strains), and 24 of which represent the evolved lines of these starting strains at the end of the experiment. The six starting strains (3 *M. robertsii* strains KVL 12-36 (C17), KVL 12-38 (F19), and KVL 12-35 (E81) and 3 *M. brunneum* strains KVL 13-13 (G39), KVL 12-37 (J65), and KVL 13-14 (L105; all obtained from the University of Copenhagen, Denmark (B. Steinwender, J. Eilenberg and N.V. Meyling)) had been collected from an agricultural field in Denmark by Steinwender et al. (2). After being grown as monospore cultivar, the six strains were mixed in equal amounts (total concentration of  $1 \times 10^6$  spores ml<sup>-1</sup>) and were used to co-infect workers of the Argentine ant, *Linepithema humile*, over ten host infection cycles in each of two selection treatments (each in ten independent replicate lines), as detailed in Stock et al. (1). In the “individual treatment”, the worker ant remained alone after exposure, whilst it was accompanied by two untreated nestmates in the “social treatment”. After each infection cycle, the spores growing out of the first eight dying workers per replicate line (ants dying within the first 24 h after exposure, as well as nestmates were not considered) were harvested, mixed and used to infect a new round of hosts, which were then consistently kept either under the individual resp. social treatment conditions depending on the replicate. After passage 5 and 10 of the experiment, it was determined, which strains were still present in the mix (Stock et al., Fig. 1). At the end of the experiment, 16 lines contained only a single strain genotype (identified by microsatellite analyses) whilst four lines were a mix of two persisting spore types from two different starting strains (see Stock et al. (1)). One spore of each type of these evolved lines was expanded to obtain monospore cultivars of all the strains that had been able to persist after the ten host passages. Phenotypic analyses of the lines (16 single-strain lines and the four 2-strain lines, mixed in the proportion of strain presence at the end of the experiment) found that the lines that had adapted to only the individual immune defenses of their single ant hosts showed increased virulence, whilst the lines adapted to the social immunity of the ants kept in groups, showed increased production of spores with a reduced content of the fungal cell membrane compound ergosterol (1).

In this study, we Illumina-sequenced these 24 evolved lines, as well as their six ancestral strains. We follow the terminology used in Stock et al. (1), in that the three *M. robertsii* starting strains are named R1 to R3 (R1: KVL 12-36 (C17), R2: KVL 12-38 (F19), R3: KVL 12-35 (E81)) and the three *M. brunneum* strains B1-B3 (B1: KVL 13-13 (G39), B2: KVL 12-37 (J65), B3: KVL 13-14 (L105)). To distinguish them from the evolved strains at the end of the experiment, we here extend their numbering by an “-A” for “ancestral, i.e. R1-A, for example, representing the ancestral strain of R1. The evolved strains are numbered

following their replicate line number (Fig. 1, with strain identity (given by microsatellite identification performed in Stock et al.), using “I” for the “individual” and “S” for the “social” treatment, i.e., as an example, the strain that was identified as R3 in the individual treatment replicate line 4, is abbreviated as R3-I4.

In addition to the analysis of the ancestral and evolved strains at the end of the experiment, we were here interested in the spore diversity within our evolved lines at different time points of the experiment, that is after passage 1, 3, 5 and 10. To this end, we plated the stored spore suspensions, picked single-clone colonies and determined their strain identity and the presence / absence of *chrA*, as detailed below. This was done for all evolved lines that showed R3 being present in passage 5, independent of whether it succeeded into passage 10 or not. Therefore, we analyzed replicates I4, I5 and I6 from the individual treatment and S1, S6, S7, S8, S9 from the social treatment.

### **3.2. Pulsed-field gel electrophoresis (PFGE)**

Spores were grown in liquid LB medium (2% sucrose, 1% peptone, 0.3% yeast extract and 0.5% NaCl [w/V]) at 23°C, 200 rpm for 5-10 days, filtered through a sieve, centrifuged (3000 x g, 10 min, RT), the pellet was washed and centrifuged again in 1 X TE buffer. The pellet was resuspended in 500 µl H<sub>2</sub>O and 500 µl 2.2% low melting agarose and filled into plug casts. After solidification, ten plugs were incubated in 5 mL lysis buffer (0.45 M EDTA, pH 8.0, 1% SDS, 1.5 mg/mL Proteinase K) for 24 h at 55°C. After 24 h, the lysis buffer was replaced with fresh lysis buffer and the incubation was repeated. After 48 h, the plugs were washed three times with 1x TE for 20 min each and stored in 0.5 M EDTA. PFGE was performed for 72 h in 1x TBE buffer at 14°C, 3 V/cm, 106° and 250-1000 s switching time in a CHEF Dr III system using *Hansenula wingei* chromosomes (1.05-3.13 Mb) as size marker (Bio-Rad, Hercules, CA, USA). DNA was stained for 30 min in 0.1 µg/mL Ethidiumbromid in H<sub>2</sub>O and destained in H<sub>2</sub>O for 10 min before documentation.

To identify the accessory chromosomes represented by the individual bands visible in the PFGE gel, these bands were excised. To approximately 100 mg of excised PFGE band, 260 µl H<sub>2</sub>O and 40 µl β-agarase buffer (10x) (New England Biolabs) were added and the agarose plug was melted by incubation at 99°C for approximately 15 min until completely melted, followed by 15 min at 80°C. The mixture was brought to 42°C and 4 units of β-agarase (New England Biolabs) added and further incubated at 42°C, 350 rpm for 90 min. 44 µl of 3 M NaOAc was added and the mixture cooled on ice for 15 min before centrifugation for 15 min at 15000 x g. 350 µl was transferred to a new tube and 240 µl of isopropanol was added and centrifuged for 15 min at 15000 x g, 4°C and the pellet was washed with 700 µl of 70% ethanol, dried and dissolved in 20 µl of H<sub>2</sub>O and sequenced. Sequencing was performed using the Ultra Low Input DNA library and Illumina sequenced with 150 PE reads on a NextSeq 2000 sequencer at the Max Planck Genome Centre Cologne, Germany.

### 3.3. Proportion of chrA-containing spores over the course of the experiment

The spore suspensions of passages 1, 3, 5 and 10 from the eight replicate lines that contained the R3 strain at least until passage 5 of the experiment (see Fig. 1 of Stock et al. (1)), were plated on selective medium agar plates, containing 6.5% Sabouraud dextrose agar (Sigma-Aldrich), 1 ml each of Syllit 450 SC (110 mg/ml; Kwizda), Chloramphenicol (100 mg/ml; Sigma-Aldrich) and Streptomycin (100 mg/ml; Sigma-Aldrich) and incubated for one week at 23°C in the dark. Individual clones were selected and transferred to DNeasy 96-well plates (Qiagen) containing 50 µl of nuclease-free water (Sigma-Aldrich). Samples were homogenized in a TissueLyser II (Qiagen) using approx. 100 mg of glass beads (425-600 µm; Sigma-Aldrich) in two steps (2 × 2 min at 30 Hz). Total DNA of the spore-cultivars was extracted using DNeasy 96 Blood & Tissue Kit (Qiagen) according to manufacturer's instructions, with a final elution volume of 50 µl Buffer AE. R3 clones were identified using the same microsatellite loci as in Stock et al. (1) Ma307 and Ma2054. Presence of chrA was determined in all R3 spore clones using primers designed in this study. For primer sequences see Table S8. Each PCR run included a no-template control and two further control reactions (negative control: R3-A genomic DNA which does not contain the chrA; positive control: R1-A genomic DNA, which contains chrA). To verify that the absence of detection of chrA was not due to PCR failure, each PCR that aimed at detecting the presence/absence of chrA was multiplexed with a set of general *M. robertsii* primers that amplify a region on the core chromosomes, and the results of PCR reactions for the absence/presence of chrA were only included in the analysis if the general *M. robertsii* primers did produce the specific PCR product. All reactions were performed using MyTaq HS Red Mix (Bioline), 10 pmol of each primer (Ma307 only 5 pmol per primer) and 4 µl of genomic DNA. PCR amplifications for strain identification were performed as follows: initial denaturation at 95 °C for 1 min, followed by 35 cycles of 30 s at 95 °C, 1 min at 59°C (Ma307) resp. 60 °C (Ma2054) and 1 min at 72°C and a final extension step at 72°C for 7 min. For the detection of chrA in R3 clones we used three sets of primers targeting different regions (left chromosomal arm, center, right chromosomal arm) of the chrA sequence, to make sure that the whole chrA was transferred. To ensure the specificity of the primers to the intended PCR template, we used Primer-BLAST (<https://www.ncbi.nlm.nih.gov/tools/primer-blast/>) and tested for off-target amplification against the assembled genomes of R1-A, R3-A and R3-I4. Amplifications were performed as follows: initial denaturation at 95 °C for 1 min, followed by 30 cycles of 15 s at 95 °C, 15 s at 60 °C and 10 s at 72°C. In total 2626 individual spore clones (872 of which were already published in Stock et al. (1) and 1754 of which were produced in the course of the current study) were used. 883 of these clones were found to be R3 and were further analyzed for the presence of chrA. A detailed summary of the results can be found in Supplementary Data S1.

**Table S8:** Primers used within this study

| Aim                              | Primer name                    | Sequence (5' → 3')                            | Product size [bp]  |
|----------------------------------|--------------------------------|-----------------------------------------------|--------------------|
| <i>M. robertsii</i> confirmation | Mrobertsii_F<br>Mrobertsii_R   | GACGAAAAGATTTGCGGCACC<br>TCACGATCCTTGAGACACGC | R1: 122<br>R3: 116 |
| R3 strain identification         | Ma307_F<br>Ma307_R             | CATGCTCCGCCTTATTCCTC<br>GGGTGGCGAAGAAGTAGACG  | 161                |
|                                  | Ma2054_F<br>Ma2054_R           | GCCTGATCCAGACTCCCTCAGT<br>GCTTTCGTACCGAGGGCG  | 230                |
| chrA detection                   | ChrA_left_F<br>ChrA_left_R     | ACTTGCCGCTCGAAAAACAC<br>CCTATTGGACCTTCCGTGCAA | 150                |
|                                  | ChrA_center_F<br>ChrA_center_R | AAAGATCGCGGGTGACAAC<br>AACAGGACATCACGCTCTGC   | 200                |
|                                  | ChrA_right_F<br>ChrA_right_R   | ACAGGCACGTGAGCTTCTAC<br>GTTCTAGCAGTGGTTGACGGA | 250                |

### 3.4. Generating Genome Assemblies

#### *DNA preparation for sequencing*

DNA for Nanopore and PacBio sequencing was extracted using the Blood & Cell Culture DNA Midi Kit (Qiagen). Cells were grown in LB media at 23°C, 200 rpm for five to seven days and cells were collected by centrifugation (2000xg, 10min). For Nanopore and Illumina sequencing the fungal material was harvested by vacuum filtration (Filtermax filter top 0.22 µm, 500 mL). The cells were washed twice using ddH<sub>2</sub>O and afterwards freeze dried using a FreeZone 2.5 Liter Benchtop Freeze Dry System (Labcono) with the following settings: -50°C, 0.04 mbar and 23°C plate-temperature, ~ 18 hours. For PacBio sequencing the material was harvested by centrifugation (10 min, 3000 x g). Cells were ground to a fine powder in liquid nitrogen and 100 mg of the resulting powder was used for DNA isolation according to the manufacturer's instructions. Nanopore sequencing was performed by the Next Generation Sequencing Facility at Vienna BioCenter Core Facilities (VBCF), member of the Vienna BioCenter (VBC), Austria. PacBio sequencing of *M. guizhouense* was performed at the Max Planck Genome Centre Cologne, Germany using Sequel IIe (Pacific Biosciences). Illumina Sequencing was performed at Eurofins Genomics GmbH (Ebersberg). An overview of the sequencing reads generated in this study is given in Table S8.



### Nanopore Sequencing and Assembly generation

Sequencing: R9.4.1 Minion Flow cells. Base calling was performed using guppy v5.0.11 using the model dna\_r9.4.1\_450bps\_hac (high accuracy). For the generation of the nanopore-based assemblies we used the pipeline described in (3). In short: Called Nanopore reads were filtered to reads longer than 5000 bases using NanoFilt (v2.3.0) (4). The 150 PE Illumina Reads employed for the correction of the Nanopore reads were trimmed using Trimmomatic V0.39 (5) The Nanopore reads were then corrected by the trimmed 150 PE Illumina reads using FMLRC 2 (0.1.4) (6) followed by further trimming using Canu (v2.1.1) (7). These corrected and trimmed Nanopore reads were assembled by flye (V 2.8.3) including two rounds of polishing (8). The resulting assembly was further polished using the uncorrected Nanopore reads by Racon (V1.4.20) (9) in two rounds and further polished by Medaka (V 1.4.3). Finally, the assembly was polished four times using the 150 PE Illumina reads by Pilon (V 1.24) (10) after mapping with BWA-MEM2 (V 2.2.1) (11) and samtools (1.12) (12). The final assembly was analyzed using Tapestry (V 1.0.0) using the telomeric sequence TTAGGG (13). Due to the lower number of reads >5000 bases for the R1-A reads >3000bp were used for the Tapestry analysis. All contigs that showed a lower average coverage than 30 and larger than 100 were excluded from the assembly (this affected five contigs of the R3-I4 and 22 contigs of the R1-A and three contigs (130 kb) of the R3-A genome assembly. A script for the bioinformatic pipeline is available at [michaelH-git/Metarhizium\\_chromosome\\_transfer \(github.com\)](https://github.com/michaelH-git/Metarhizium_chromosome_transfer) (14).

**Table S9:** Summary statistics of final genome assemblies (generated with Quast (V 5.0.2) (15).

| Statistics without reference | R1-A     | R3-A     | R3-I4    |
|------------------------------|----------|----------|----------|
| # contigs                    | 41       | 18       | 16       |
| # contigs (>= 0 bp)          | 41       | 18       | 16       |
| # contigs (>= 1000 bp)       | 41       | 18       | 16       |
| # contigs (>= 5000 bp)       | 40       | 18       | 16       |
| # contigs (>= 10000 bp)      | 38       | 18       | 16       |
| # contigs (>= 25000 bp)      | 36       | 16       | 15       |
| # contigs (>= 50000 bp)      | 30       | 18       | 14       |
| Largest contig               | 7267018  | 10479110 | 10465571 |
| Total length                 | 42768942 | 43163266 | 45009773 |
| Total length (>= 0 bp)       | 42768942 | 43163266 | 45009773 |
| Total length (>= 1000 bp)    | 42768942 | 43163266 | 45009773 |
| Total length (>= 5000 bp)    | 42764321 | 43163266 | 45009773 |
| Total length (>= 10000 bp)   | 42746527 | 43163266 | 45009773 |
| Total length (>= 25000 bp)   | 42702419 | 43106281 | 44996207 |
| Total length (>= 50000 bp)   | 42487955 | 43163266 | 44953661 |
| N50                          | 4406720  | 4812484  | 4807498  |
| N75                          | 2994606  | 2774337  | 4300840  |
| L50                          | 4        | 3        | 3        |

|                   |       |       |       |
|-------------------|-------|-------|-------|
| L75               | 7     | 6     | 6     |
| GC (%)            | 49.76 | 50.29 | 50.24 |
| Mismatches        |       |       |       |
| # N's             | 0     | 0     | 0     |
| # N's per 100 kbp | 0     | 0     | 0     |

### 3.5. Generation of Annotations

Transposable Element annotation was generated using the REPET pipeline (16, 17) following the pipeline as described in (18). In short, first a *denovo* annotation (TEdenovo) was created which allowed for the generation of the consensus sequences of TEs. These were subsequently used to annotate the TEs in the genome by two rounds of TEannot.

Gene annotation was generated using Braker 2.0 (version 2.1.6) (19) based on protein homology information from the OrthoDB fungal database (Version 10). The Augustus gene prediction generated by Braker 2.0 was used for all subsequent analysis.

Statistics of Proteins: A total of 12027, 12254, and 12131 genes were predicted in the R1-A, R3-A or R3-I4 genome, respectively. The predicted proteins had the following results of BUSCO Analysis 99.7% (R1-A: 3809/3817 BUSCO groups) or 99.8% (R3-I4: 3810/3817 BUSCO groups) or 99.8% (R3-A: 3809/3917 BUSCO groups)

The proteins were functionally annotated using Blastp Swissprot reference database using blastp (V 2.12.0): For proteins encoded by genes located on chrA the number of GO Annotations were created, mapped and merged using Blast2GO (V6.0.3).

CAZymes were annotated using dbCAN2 (20) using HMMER:dbCAN with thresholds: E-Value <  $1e^{-15}$ , coverage >0.35) and DIAMOND: CAZy (E-Value <  $1e^{-102}$ ) und HMMER:dbCAN-sub (E-Value <  $1e^{-15}$ , coverage >0,35).

Secreted Proteins were identified using SignalP (v 6.0) (21) and of these putative effectors were predicted using EffectorP (v 3.0) (22). Secondary Metabolite cluster were predicted by AntiSMASH (v 6.0) (23).

A script for the bioinformatic pipeline is available at [michaelH-git/Metarhizium\\_chromosome\\_transfer\(github.com\)](https://github.com/michaelH-git/Metarhizium_chromosome_transfer) (14).

### 3.6. Comparison with existing reads and assemblies

Publicly available whole genome sequencing reads and assemblies of 30 isolates from species of the genus *Metarhizium* were included in the analysis of the distribution of the accessory chromosomes within the genus. For twelve samples these were assemblies and for 18 samples these consisted of WGS reads (See Table S8 – overview of assemblies and reads, (2))

For the synteny analysis between assemblies the following the assemblies were aligned with nucmer (version 4.0.0rc1) and the matches were filtered for those of min 1000bp length with a minimum identity of 90%. Of these bedfiles for the coverage-analysis were generated and the SNPs in covered regions were determined. Alignments were visualized by using dotPlotly (<https://github.com/tpoorten/dotPlotly>) in R (see example below):

```
Rscript --vanilla pafCoordsDotPlotly.R -i R3-I4_Mguizhouense.i90.l1000.paf -q 10000 -m 10000 -p 15 -s -o R3-I4_Mguizhouense.i90.l1000 -k 16
```

For the analysis of the coverage and SNPs of the whole genome sequencing reads deposited for 18 isolates we first deinterleaved the reads using bbmap (version 39.01) and then removed adapter using trimmomatic (V0.39) before mapping and SNP calling by bowtie2 (version 2.4.4) and bcftools mpileup (version= 1.14) and filtering the called SNPs to high quality (Q>50) in callable regions (DP>6). A script for the bioinformatic pipeline is available at [michaelH-git/Metarhizium\\_chromosome\\_transfer \(github.com\)](https://github.com/michaelH-git/Metarhizium_chromosome_transfer) (14).

### **3.7. SNP calling using the Illumina reads of ancestral and evolved strains**

Illumina reads were trimmed as described above and mapped onto the three Nanopore-based (R1-A, R3-A, R3-I4) assemblies using bowtie2 (version 2.4.4), samtools (version 1.3.1). The resulting BAM file was reformatted using the Picard functionality (version 2.24.0) and SNPs called using bcftools mpileup (version 1.14). The resulting raw VCF file was further filtered using bcftools (version 1.14). A script for the bioinformatic pipeline is available at [michaelH-git/Metarhizium\\_chromosome\\_transfer \(github.com\)](https://github.com/michaelH-git/Metarhizium_chromosome_transfer) (14).

### **3.8. Calling of structural variants using nanopore reads**

Nanopore reads were mapped to the R3-I4 nanopore-based assembly using minimap2 (version 2.26-r1175) and reformatted using samtools (version 1.17) and structural variants were called using Sniffles2 (version 2.2) (24) and called structural variants filtered by having a AF>0.7 within the sample, to only report structural variants that are supported by the majority of reads. A script for the bioinformatic pipeline is available at [michaelH-git/Metarhizium\\_chromosome\\_transfer \(github.com\)](https://github.com/michaelH-git/Metarhizium_chromosome_transfer) (14).

### **3.9. Phasing of SNPs and small InDels for *Metarhizium guizhouense* ARSEF977**

In order to phase the SNPs and small InDels of the *M. guizhouense* ARSEF977 that showed duplicated coverage of the accessory chrA *M. guizhouense* was re-sequenced PacBio HiFi chemistry. The reads were mapped onto the onR3-I4 assembly using minimap2 (version 2.24-r1122) and samtools (version 1.3.1). SNPs and small InDels were phased using WhatsHap (version1.6). Please note that due to the fact that chrA of the R3-I4 assembly showed a disomic sequencing coverage, a ploidy of two was used for the calling of SNPs and filtering was based on quality (>50) and readdepth (DP>10) using

bcftools (version 1.14). A detailed script for the bioinformatic pipeline is available at [michaelH-git/Metarhizium\\_chromosome\\_transfer \(github.com\)](https://github.com/michaelH-git/Metarhizium_chromosome_transfer) (14).

Out of the total 3090 heterozygous SNPs on chrA, 2790 were phased as 0|1 and 294 as 1|0. The relative position of all the heterozygous SNPs to each other remained unclear as not all of them were located in one phase block. We used the distribution of heterozygous SNPs within and between phase blocks to estimate the number of SNPs on each copy of chrA.

The distribution of phased SNPs was non-random, indicating that the phase blocks did not contain an equal number of heterozygous SNPs of both phases. This suggests that the number and distribution of SNPs on each copy of ChrA are not similar. Specifically, most phase blocks contained SNPs of only one phase (25 out of 28 phase blocks in total), while only three phase blocks contained SNPs of both phases, meaning that the location of the SNPs is on two different copies. For example, the largest phase block with SNPs of both phases (chrA: 587009-1035720) consisted of 1076 phased SNPs. Of these, 1064 (98.9%) were phased as 0|1 and only 12 (1.1%) were phased as 1|0 (Fig. 4 B). This distribution of SNPs between the two copies of chrA in one phase block would be highly unlikely if both copies of chrA had the same density and distribution of SNPs ( $p < 2.2 \times 10^{-16}$ , binomial test). As a result, it was concluded that the two copies of chrA differ in SNP density and distribution.

Due to the presence of several phase blocks along chrA, it was not possible to directly assign phases 0|1 or 1|0 to a specific copy of chrA. Therefore, the number of mixed phase blocks (containing SNPs from both phases) and unmixed phase blocks (containing SNPs from only one phase) were used to estimate the number of SNPs on each of the two copies of chrA. We argued that, conservatively, the relative frequency of unmixed phase blocks is representative of the relative frequency of SNPs on one copy, while the relative frequency of mixed phase blocks is representative of the relative frequency of SNPs on the other copy of chrA. Therefore, we assumed that the frequency distribution of mixed and unmixed phase blocks represents the true distribution of SNPs among the two copies of chrA. Out of the 28 phase blocks, 25 (relative frequency: 89.3%) exclusively contained SNPs from the same phase, while three (10.7%) contained SNPs from both phases. Therefore, copy a contains an estimated 2769 SNPs (calculated as  $3084 \text{ phased SNPs} \times 25/28 + 6 \text{ non-phased SNPs} + 9 \text{ homozygous SNPs}$ ), while copy b contains approximately 345 SNPs (calculated as  $3084 \text{ phased SNPs} \times 3/28 + 6 \text{ non-phased SNPs} + 9 \text{ homozygous SNPs}$ ).

### **3.10. Phylogenetic analysis of putative histone encoding genes**

Sequences of genes annotated to encode histones in 16 different fungal species and one oomycete were obtained from FungiDB (release 66). These sequences and the 12 sequences from genes encoding putative histone in the genome of *M. robertsii* strain R3-14 were aligned using MUSCLE and a maximum likelihood phylogeny with uniform

rates and the Tamura-Nei model for substitutions was determined and tested using 500 bootstrap replications as implemented in the MEGA software package (version 11.0.13). The resulting phylogeny was visualized using the iTOL software (<https://itol.embl.de/>).

### 3.11. GO enrichment analysis and determination of gene-wise dn/ds ratios.

GO-term enrichment analysis was performed using the blast2go software package (version 6.0.3). The SNPs determined for *M. guizhouense* on the R3-I4 assembly were used to determine the dN/dS ratios. The SNPs in the VCF were used by bcftools (version 1.17) consensus to generate *M. guizhouense* consensus sequences, and the cds were extracted from these using the AGAT (v1.0.0) software package. The corresponding fasta sequences of the cds from the R3-I4 and *M. guizhouense* consensus were aligned pairwise using clustalo (version 1.2.4), and these pairwise alignments for each transcript were then used in the ape package (version 5.7.1) in R (version 4.2.1) to determine the genewise dN/dS ratio. A detailed script for the bioinformatics pipeline is available at [michaelH-git/Metarhizium\\_chromosome\\_transfer \(github.com\)](https://github.com/michaelH-git/Metarhizium_chromosome_transfer) (14).

### 3.12. Sequencing coverage analysis and distribution of SNPs in 50 kb windows

Calculation of median coverage in 50000 bp non-overlapping windows and the fraction of the windows that is covered by at least 5 reads using mosdepth (version 0.3.3) and recovering the number of SNPs in those windows.

Generating 50 kb windows using bedtools (version v2.25.0)

```
bedtools makewindows -b assembly.bed -w 50000 -i srcwinnum >
assembly_window_50000.bed
mosdepth -t 10 -n -T 5 -b assembly_window_50000.bed out out_RG_Dedup.bam
bedtools intersect -c -a assembly_window_50000.bed -b filtered.vcf > SNP_50kb.counts
```

### 3.13. Genewise relative synonymous codon usage

Genewise relative codon usage was estimated using BioKIT (version 0.1.3) with the following command:

```
biokit gene_wise_relative_synonymous_codon_usage cds.fasta >
cds.genewise.codonusage
```

### 3.14. Determining the Cytosine methylation within CpG context.

To determine the whether a cytosine in a CpG context was methylated the base calling of the nanopore reads was repeated using guppy (Version 6.4.8+31becc9), minimap2 (version 2.24-r1122) Samtools (version 1.13) was used to merge the BAM-files and mod with the model dna\_r9.4.1\_450bps\_modbases\_5mc\_cg\_sup.cfg. Modified bases were called using mod\_kit (version 0.1.4) with the following command:

```
modkit pileup mod.bam out.bed --cpg --ref R3-I4.fasta
```

### 3.15. Statistical tests

Statistical tests were performed on the methylation data (Fig. S4 A) using a two-sided Fisher exact test comparing the count data for the two indicated groups for the total number of CpG sites and the number of methylated sites. The p-values were adjusted for multiple testing using the Benjamini-Hochberg (BH) correction. To compare codon usage bias (Fig. S6 C), all groups were first compared using a Kruskal-Wallis rank-sum test and later pairwise comparisons were calculated using the Wilcoxon rank-sum test (for unpaired data). To compare the dN/dS ratios (Fig. S9 B) all groups were first compared using a Kruskal-Wallis rank-sum test and later pairwise comparisons were calculated using the Wilcoxon rank-sum test (for unpaired data) The exact p-values can be found in Supplementary tables S10-S12.

**Table S10:** Statistical comparison of methylated CpGs in FigS5A

Results of Fisher's exact text (two sided, BH correction for multiple testing)

| Comparison |            | p value (exact) |
|------------|------------|-----------------|
| R3-A_chrB  | R3-A_rest  | 1               |
| R3-A_chrB  | R1-A_chrA  | <4.62E-15       |
| R3-A_chrB  | R1-A_rest  | <4.62E-15       |
| R3-A_chrB  | R3-I4_chrA | <4.62E-15       |
| R3-A_chrB  | R3-I4_chrB | 1               |
| R3-A_chrB  | R3-I4_rest | 1               |
| R3-A_rest  | R1-A_chrA  | <4.62E-15       |
| R3-A_rest  | R1-A_rest  | <4.62E-15       |
| R3-A_rest  | R3-I4_chrA | <4.62E-15       |
| R3-A_rest  | R3-I4_chrB | 1               |
| R3-A_rest  | R3-I4_rest | 0,0001518       |
| R1-A_chrA  | R1-A_rest  | <4.62E-15       |
| R1-A_chrA  | R3-I4_chrA | <4.62E-15       |
| R1-A_chrA  | R3-I4_chrB | <4.62E-15       |
| R1-A_chrA  | R3-I4_rest | <4.62E-15       |
| R1-A_rest  | R3-I4_chrA | <4.62E-15       |
| R1-A_rest  | R3-I4_chrB | <4.62E-15       |
| R1-A_rest  | R3-I4_rest | <4.62E-15       |
| R3-I4_chrA | R3-I4_chrB | <4.62E-15       |
| R3-I4_chrA | R3-I4_rest | <4.62E-15       |
| R3-I4_chrB | R3-I4_rest | 1               |

**Table S11:** Statistical comparison of Gene-wise synonymous codon usage in FigS8C

Kruskal-Wallis rank sum test

data: codon\_sub\$median by codon\_sub\$Cat

Kruskal-Wallis chi-squared =

1047.5, df = 4, p-value < 2.2e-16

Pairwise comparisons using Wilcoxon rank sum test

|                       | R3-I4 (rest of<br>genome) | chrA   | chrB   | R1-A  |
|-----------------------|---------------------------|--------|--------|-------|
| chrA                  | <2e-16                    | -      | -      | -     |
| chrB                  | <2e-16                    | 0,016  | -      | -     |
| R1-A                  | 0,083                     | <2e-16 | <2e-16 | -     |
| <i>M. guizhouense</i> | 6,00E-05                  | <2e-16 | <2e-16 | 0,021 |

p-value adjustment method: BH

**Table S12:** Statistical comparison of dNds ratios in FigS9B

Kruskal-Wallis rank sum test

data: dnds by cat

Kruskal-Wallis chi-squared = 121.17, df = 2, p-value < 2.2e-16

Pairwise comparisons using Wilcoxon rank sum test with continuity correction

data: dnds\_data\$dnds and dnds\_data\$cat

|      | rest     | chrA |
|------|----------|------|
| chrA | <2e-16   | -    |
| chrB | 8,50E-13 | 0,24 |

p-value adjustment method: BH



#### 4. Legends for Datasets S1 to S14

|              |                                                                                                                            |
|--------------|----------------------------------------------------------------------------------------------------------------------------|
| Dataset S1:  | R3-I4: Functional annotation of accessory chrA                                                                             |
| Dataset S2:  | R3-I4: Genome-wide functional annotation                                                                                   |
| Dataset S3:  | Source data for Figure 1C. Sequencing coverage on R3-I4 assembly                                                           |
| Dataset S4:  | Source data for Figure 1E. Sequencing coverage on R3-I4 assembly                                                           |
| Dataset S5:  | Source data for Figure 2. Clone and ChrA frequencies                                                                       |
| Dataset S6:  | Source data for Figure 3 AB and Fig S6. Coverage and SNP densities                                                         |
| Dataset S7:  | Source data for Figure 4. Sequencing coverage of <i>M. guizhouense</i> on R3-I4 assembly and SNP densities.                |
| Dataset S8:  | Source data for Figure 5 B. Fraction of transposable elements (TEs) and genes.                                             |
| Dataset S9:  | Source data for Figure S3. Fraction of covered bases and normalized sequencing coverage of excised PFGE chromosomal bands. |
| Dataset S10: | Source data for Figure S4. Normalized sequencing coverage on R3-I4 assembly                                                |
| Dataset S11: | Source data for Figure S5B. Methylation of CpG sites.                                                                      |
| Dataset S12: | Source data for Figure S8AB. Number and Sequence length of Tes                                                             |
| Dataset S13: | Source data for Figure S8C. Gene-wise relative synonymous codon usage                                                      |
| Dataset S14: | Source data for Figure S9B. dNdsS ratios.                                                                                  |

## 5. Supplemental References

1. M. Stock, *et al.*, Pathogen evasion of social immunity. *Nat Ecol Evol*, 1–11 (2023).
2. B. M. Steinwender, *et al.*, Molecular diversity of the entomopathogenic fungal *Metarhizium* community within an agroecosystem. *Journal of Invertebrate Pathology* **123**, 6–12 (2014).
3. Z. Saud, A. M. Kortsinoglou, V. N. Kouvelis, T. M. Butt, Telomere length de novo assembly of all 7 chromosomes and mitogenome sequencing of the model entomopathogenic fungus, *Metarhizium brunneum*, by means of a novel assembly pipeline. *BMC Genomics* **22**, 87 (2021).
4. W. De Coster, S. D’Hert, D. T. Schultz, M. Cruys, C. Van Broeckhoven, NanoPack: visualizing and processing long-read sequencing data. *Bioinformatics* **34**, 2666–2669 (2018).
5. A. M. Bolger, M. Lohse, B. Usadel, Trimmomatic: a flexible trimmer for Illumina sequence data. *Bioinformatics* **30**, 2114–2120 (2014).
6. J. R. Wang, J. Holt, L. McMillan, C. D. Jones, FMLRC: Hybrid long read error correction using an FM-index. *BMC bioinformatics* **19**, 1–11 (2018).
7. S. Koren, *et al.*, Canu: scalable and accurate long-read assembly via adaptive k-mer weighting and repeat separation. *Genome Res.* **27**, 722–736 (2017).
8. M. Kolmogorov, J. Yuan, Y. Lin, P. A. Pevzner, Assembly of long, error-prone reads using repeat graphs. *Nat Biotechnol* **37**, 540–546 (2019).
9. R. Vaser, I. Sović, N. Nagarajan, M. Šikić, Fast and accurate de novo genome assembly from long uncorrected reads. *Genome Res.* **27**, 737–746 (2017).
10. B. J. Walker, *et al.*, Pilon: An Integrated Tool for Comprehensive Microbial Variant Detection and Genome Assembly Improvement. *PLOS ONE* **9**, e112963 (2014).
11. M. Vasimuddin, S. Misra, H. Li, S. Aluru, Efficient architecture-aware acceleration of BWA-MEM for multicore systems in *2019 IEEE International Parallel and Distributed Processing Symposium (IPDPS)*, (IEEE, 2019), pp. 314–324.
12. H. Li, *et al.*, The sequence alignment/map format and SAMtools. *Bioinformatics* **25**, 2078–2079 (2009).
13. J. W. Davey, S. J. Davis, J. C. Mottram, P. D. Ashton, “Tapestry: validate and edit small eukaryotic genome assemblies with long reads” (2020).
14. Habig, M. *Metarhizium* Chromosome Transfer. GitHub. [https://github.com/michaelH-git/Metarhizium\\_chromosome\\_transfer](https://github.com/michaelH-git/Metarhizium_chromosome_transfer). Deposited 27 December 2023.
15. A. Mikheenko, A. Prjibelski, V. Saveliev, D. Antipov, A. Gurevich, Versatile genome assembly evaluation with QUAST-LG. *Bioinformatics* **34**, i142–i150 (2018).
16. T. Flutre, E. Duprat, C. Feuillet, H. Quesneville, Considering transposable element diversification in de novo annotation approaches. *PloS one* **6**, e16526 (2011).

17. K. Simin, *et al.*, pRb inactivation in mammary cells reveals common mechanisms for tumor initiation and progression in divergent epithelia. *PLoS biology* **2**, e22 (2004).
18. C. Lorrain, A. Feurtey, M. Möller, J. Haueisen, E. Stukenbrock, Dynamics of transposable elements in recently diverged fungal pathogens: lineage-specific transposable element content and efficiency of genome defenses. *G3 (Bethesda)* **11**, jkab068 (2021).
19. T. Br\uuuna, K. J. Hoff, A. Lomsadze, M. Stanke, M. Borodovsky, BRAKER2: Automatic eukaryotic genome annotation with GeneMark-EP+ and AUGUSTUS supported by a protein database. *NAR genomics and bioinformatics* **3**, lqaa108 (2021).
20. H. Zhang, *et al.*, dbCAN2: a meta server for automated carbohydrate-active enzyme annotation. *Nucleic Acids Research* **46**, W95–W101 (2018).
21. F. Teufel, *et al.*, SignalP 6.0 predicts all five types of signal peptides using protein language models. *Nat Biotechnol* **40**, 1023–1025 (2022).
22. J. Sperschneider, P. N. Dodds, EffectorP 3.0: Prediction of Apoplastic and Cytoplasmic Effectors in Fungi and Oomycetes. *Mol Plant Microbe Interact* **35**, 146–156 (2022).
23. K. Blin, *et al.*, antiSMASH 6.0: improving cluster detection and comparison capabilities. *Nucleic Acids Research* **49**, W29–W35 (2021).
24. F. J. Sedlazeck, *et al.*, Accurate detection of complex structural variations using single-molecule sequencing. *Nat Methods* **15**, 461–468 (2018).
